# Supplementary material for: A First-Principles Study of the Structure and Electronic Properties of Bridged Cofacial Phenylene–Vinylene Oligomers
Source: Research Square preprint supplement (doi:10.21203/rs.3.rs-8834362/v1), 2026-02-18
Supplement: Supplementary file 1 [file d7293123344b0d6085d51cad.docx]

**Supporting information**

Title: A First-Principles Study of the Structure and Electronic Properties of Bridged Cofacial Phenylene–Vinylene Oligomers

Richard A. Ugland1, Thu Joanna M. Tran1, Briley P. Kiehl1, Melissa S. Aplet1, Arjun Kafle2, Rishi R. Pandit2, Ananta R. Adhikari3, and Mahesh Dawadi1*

1Department: Natural Sciences and Engineering, University of South Carolina Upstate, Spartanburg, SC 29303

2Chemistry, Physics, and Environmental Health Science, Benedict College, Columbia SC 29229

3Department of Natural Sciences, University of Maryland Eastern Shore, MD 21853

Table of Contents

1. Optimized geometries of 1-6 (S1-S2) and alternative structures of 1-6 (S3)
2. Gas phase-TDDFT calculated UV-vis spectra for 1-6 (S4)
3. TDDFT predicted UV-vis spectra in methylene chloride for 1-6 (S5-S9)
4. PCM-TDDFT calculated MO diagrams and individual energies for 1-6 (S10-S18)
5. Gas-Phase TD-DFT calculated electronic absorption parameters of compounds 1-6 (Table S1)
6. Gas-phase TDDFT-expansion coefficients for 1-6.
7. PCM- TDDFT-expansion coefficients for 1-6.
8. References

Hydrogen atoms have been removed from optimized geometries of 1-6 and also from alternative structures of 1-6 for clarity. The terms (syn/ anti) refer in this perspective to differences in the vector direction of the dimer chain. The dimer or tetramer structures on S1 -S2 refer to “syn” and the structures on S3 refer to “anti”.

Fig. S1. Optimized geometries of 1-3 using the DFT method with functional B3LYP and B3LYP/6-31G(d) basis sets.

Fig. S2. Optimized geometries of 4-6, using the DFT method with functional B3LYP and B3LYP/6-31G(d) basis sets.

Fig. S3. Optimized geometries of 2,3,5, and 6 using the DFT method with functional B3LYP and B3LYP/6-31G(d) basis sets.


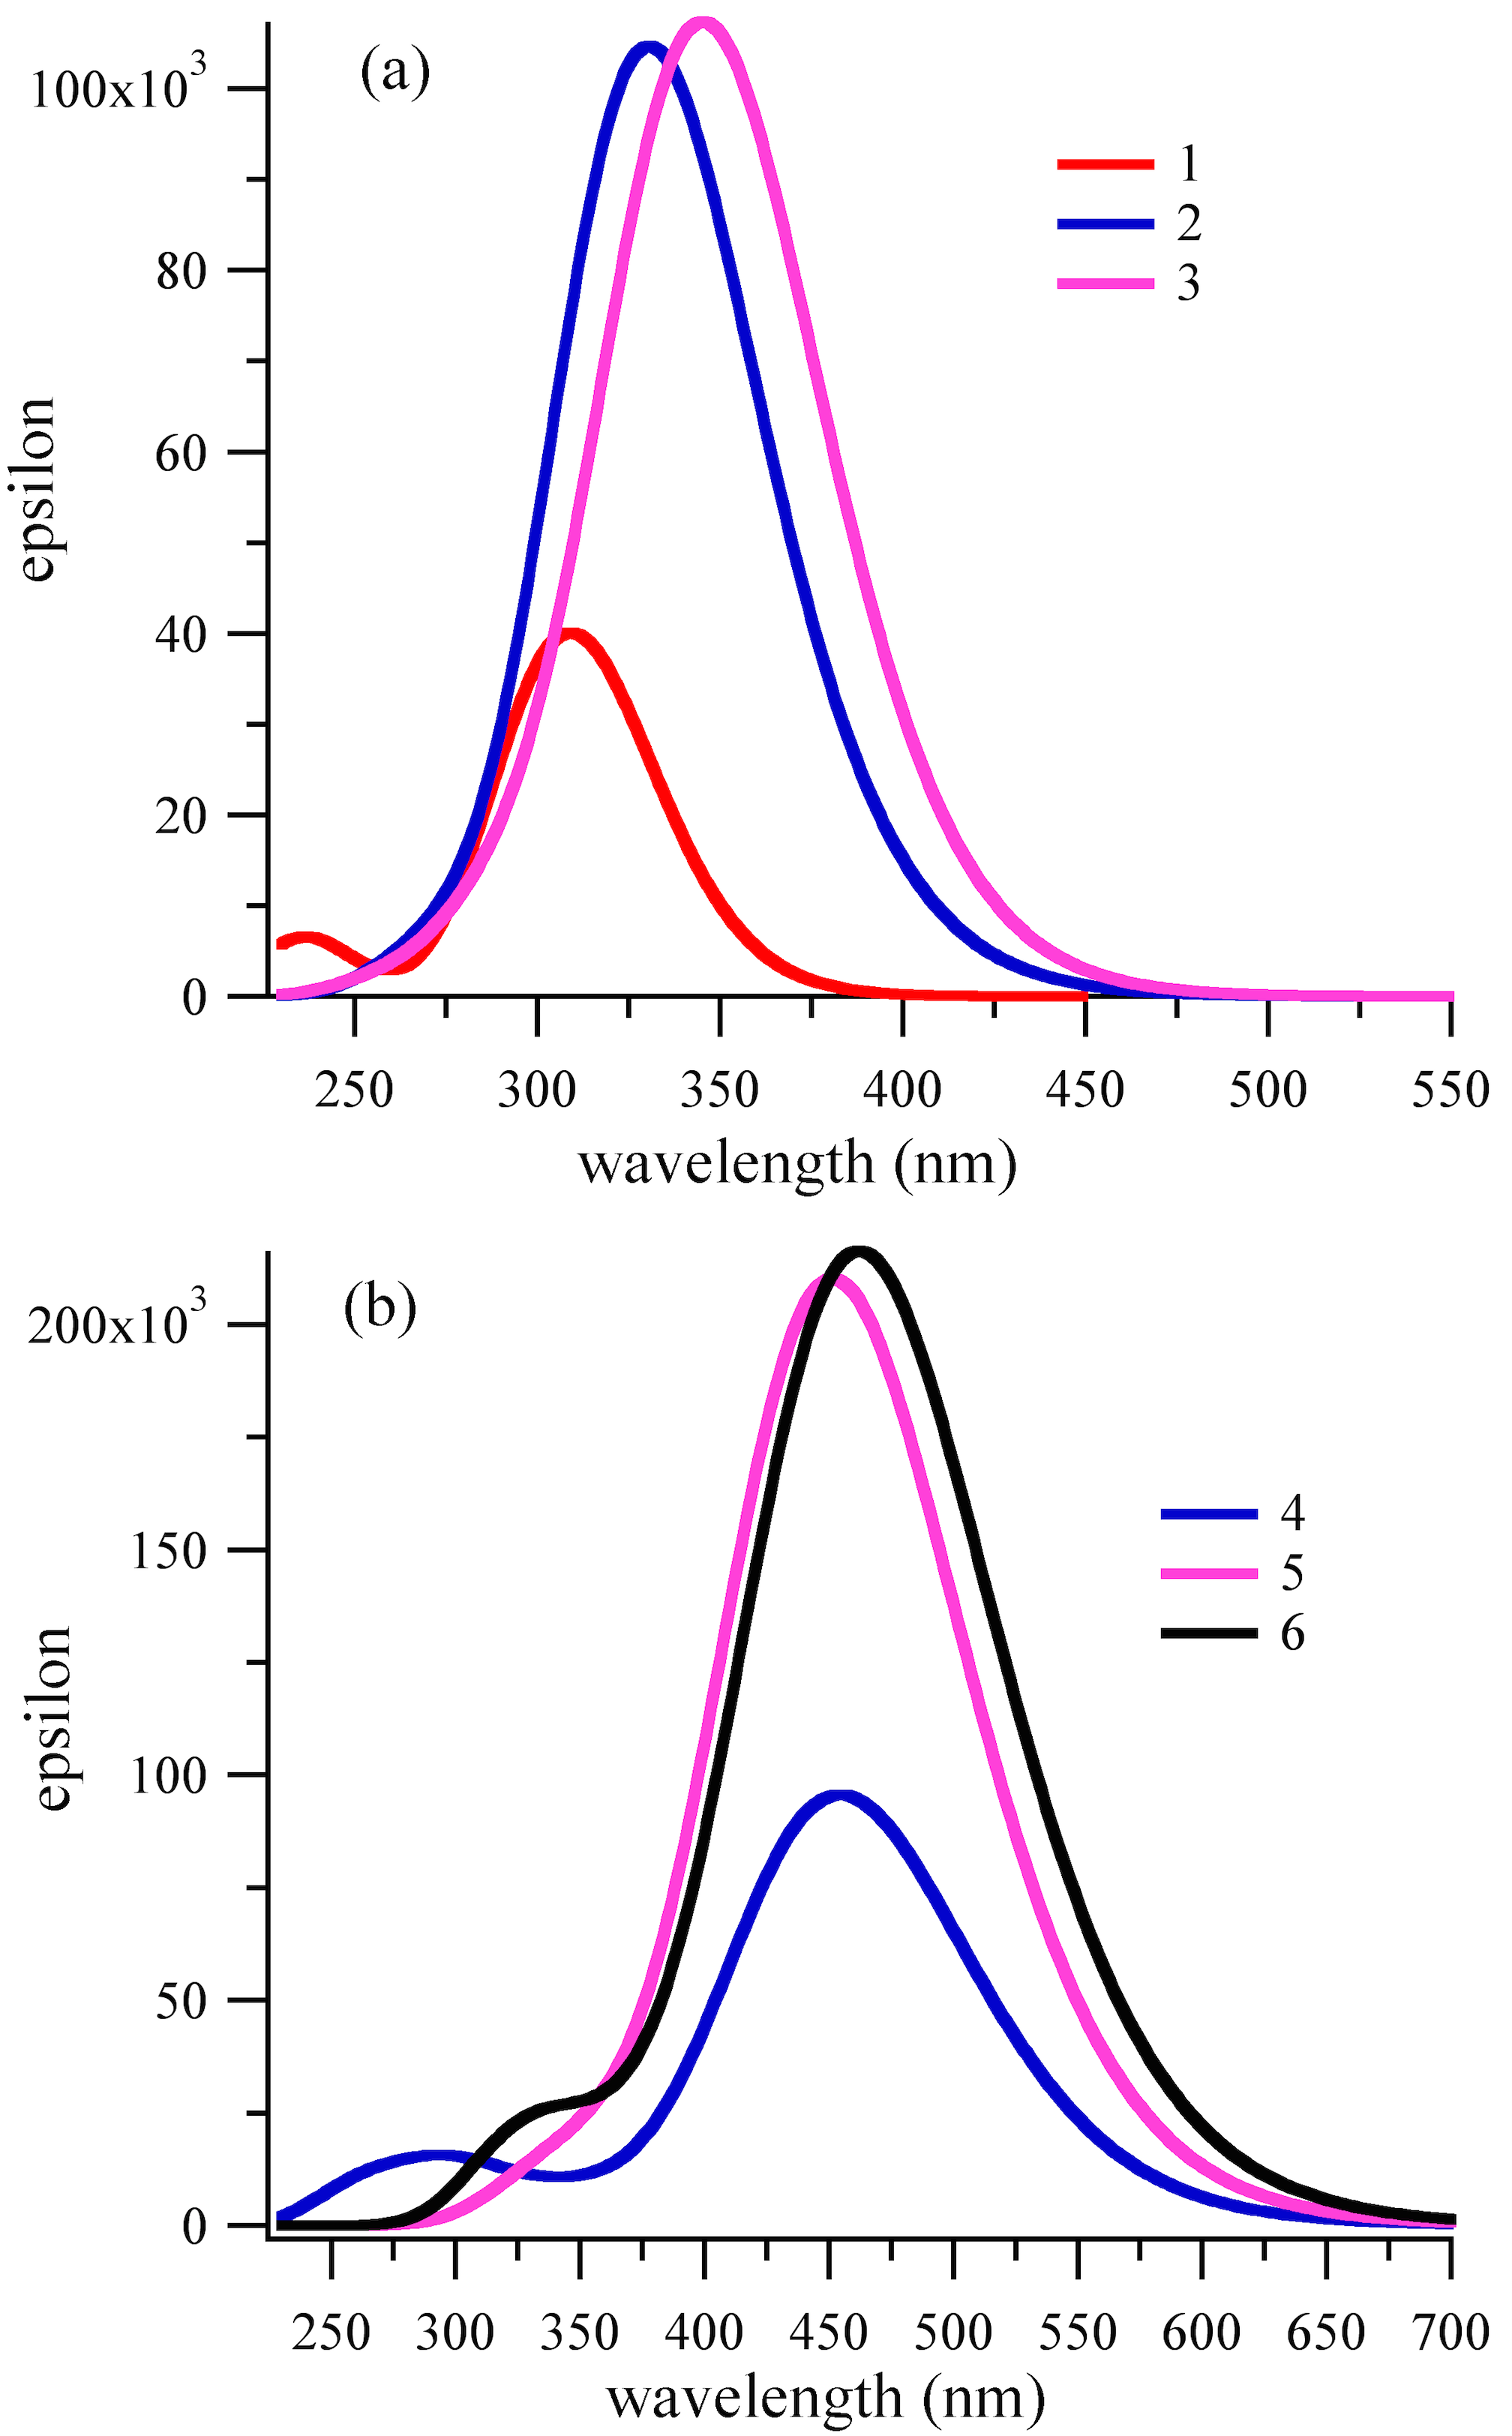


Fig. S4. Gas phase TDDFT predicted UV-vis spectra for 1-6.


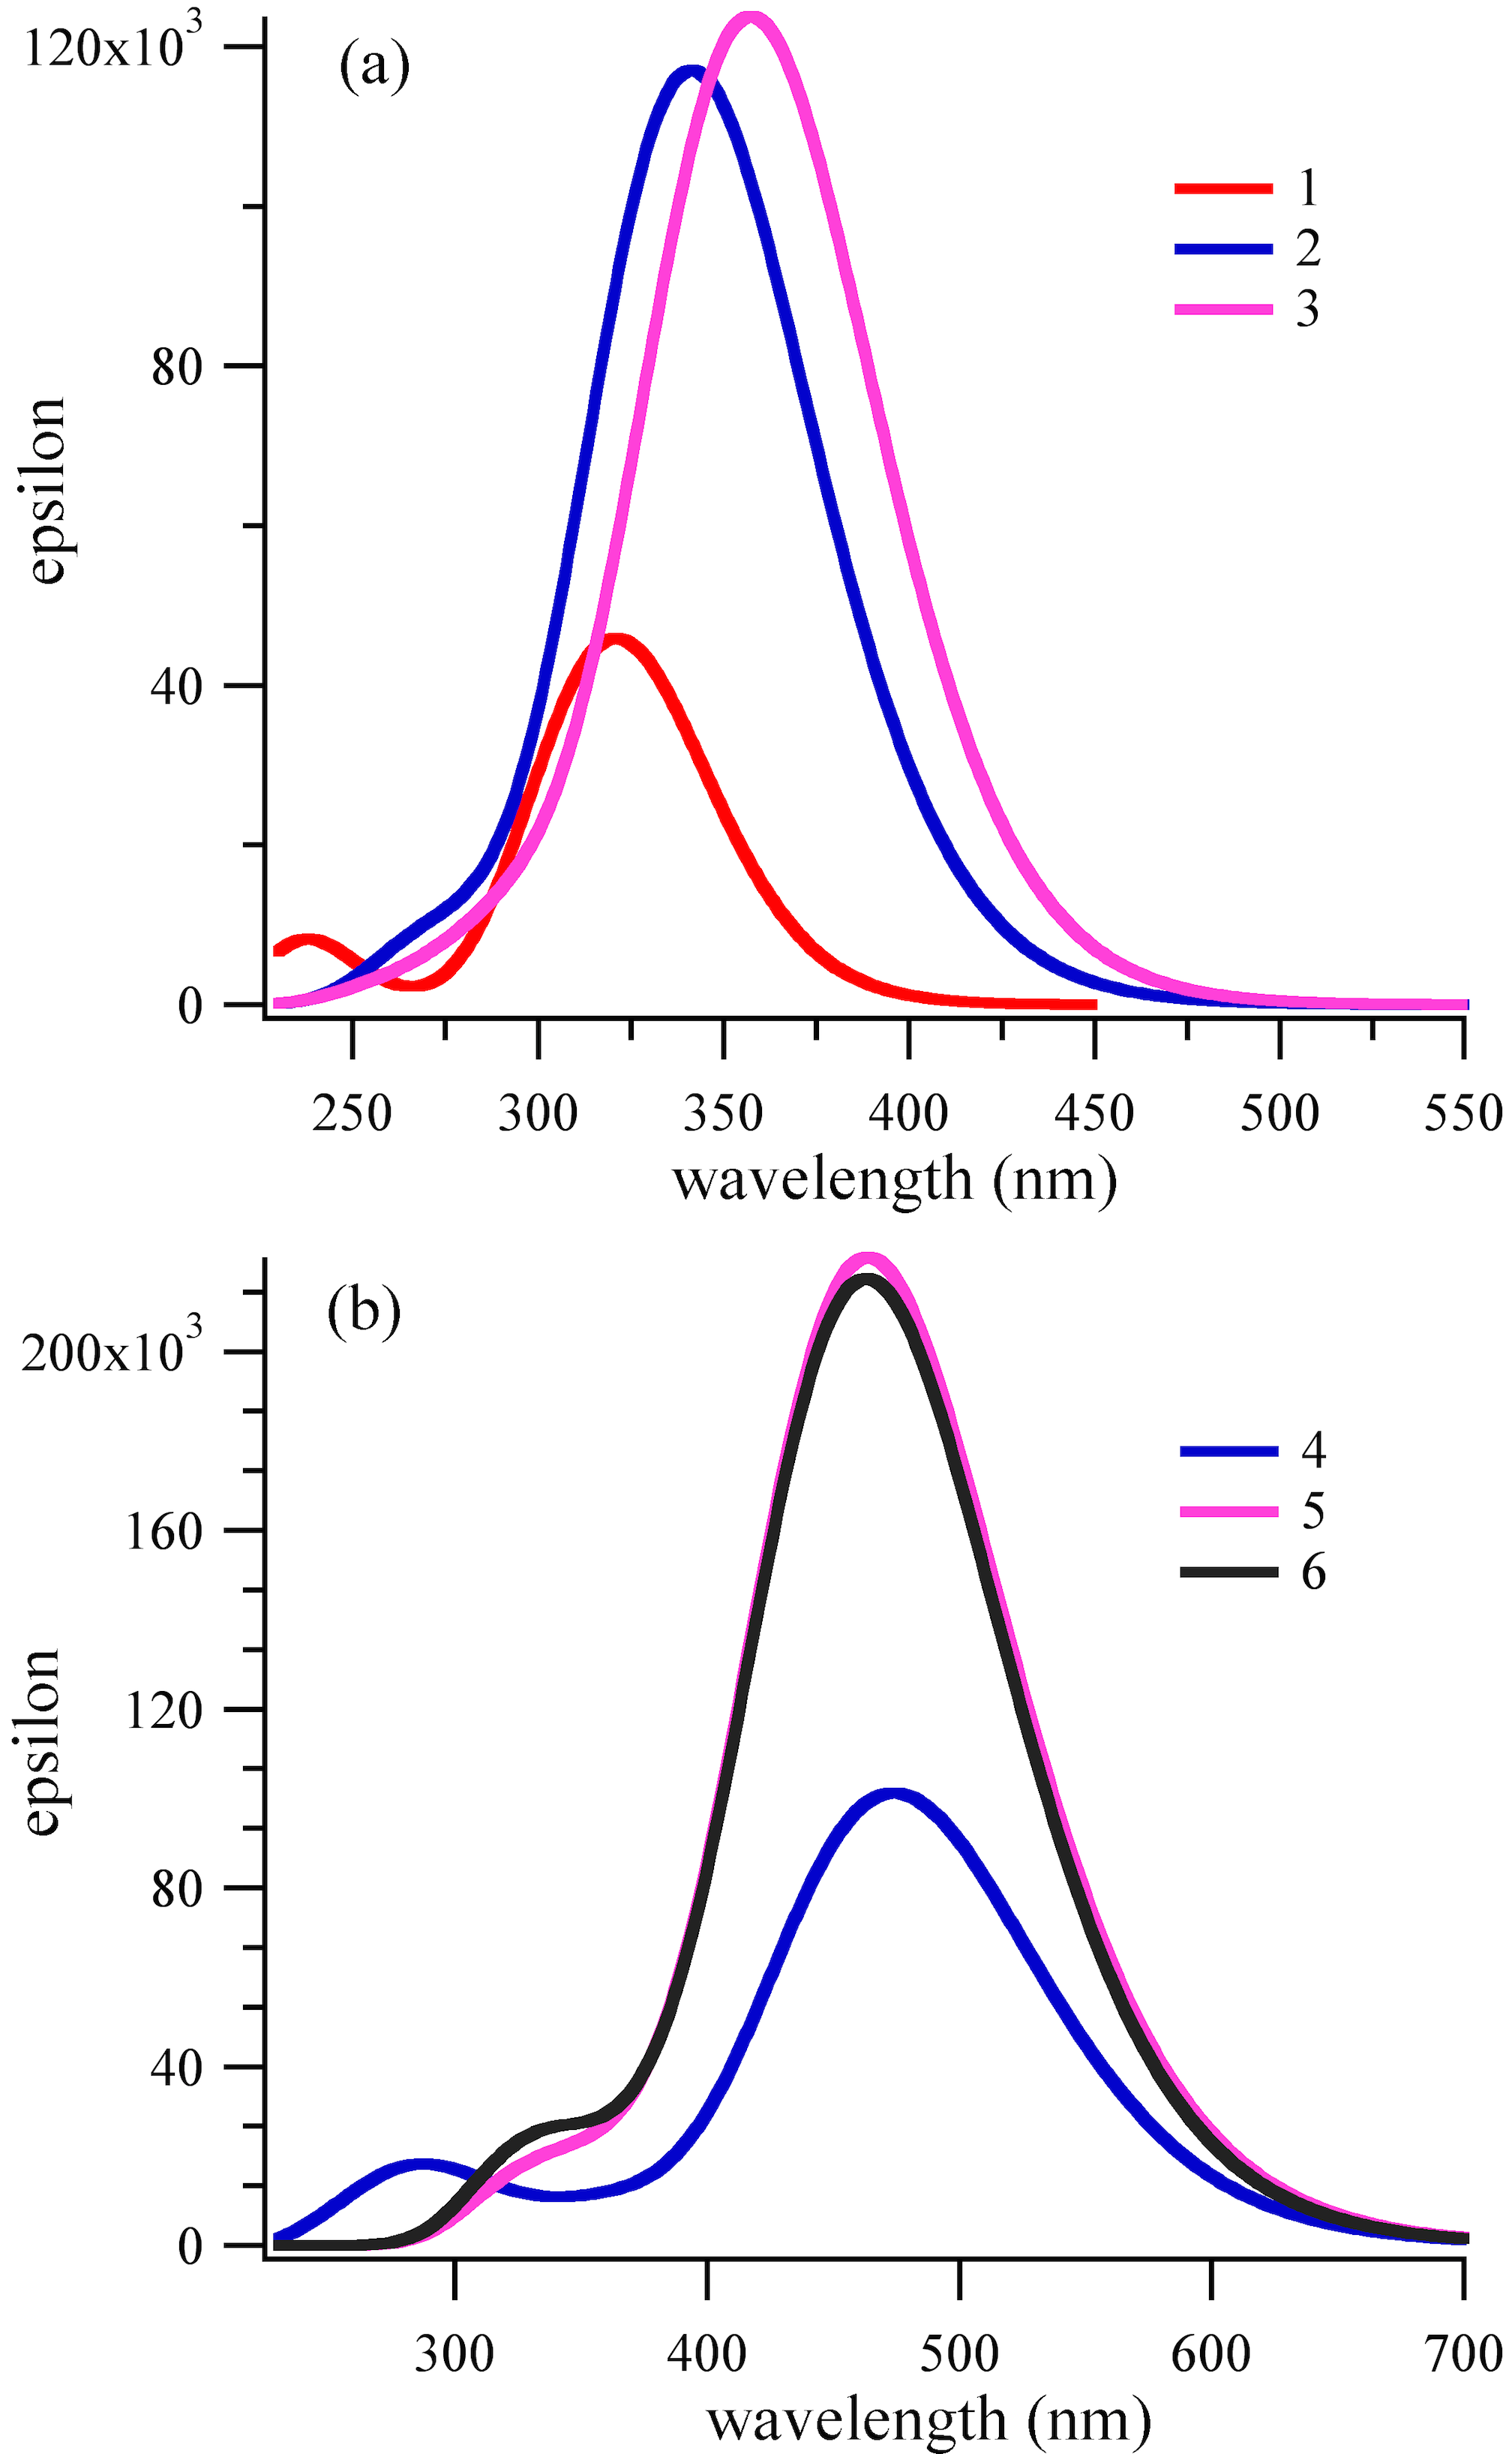


Fig. S5. TDDFT predicted UV-vis spectra in methylene chloride of (a) 1-3, (b) 4-6, where R = H.


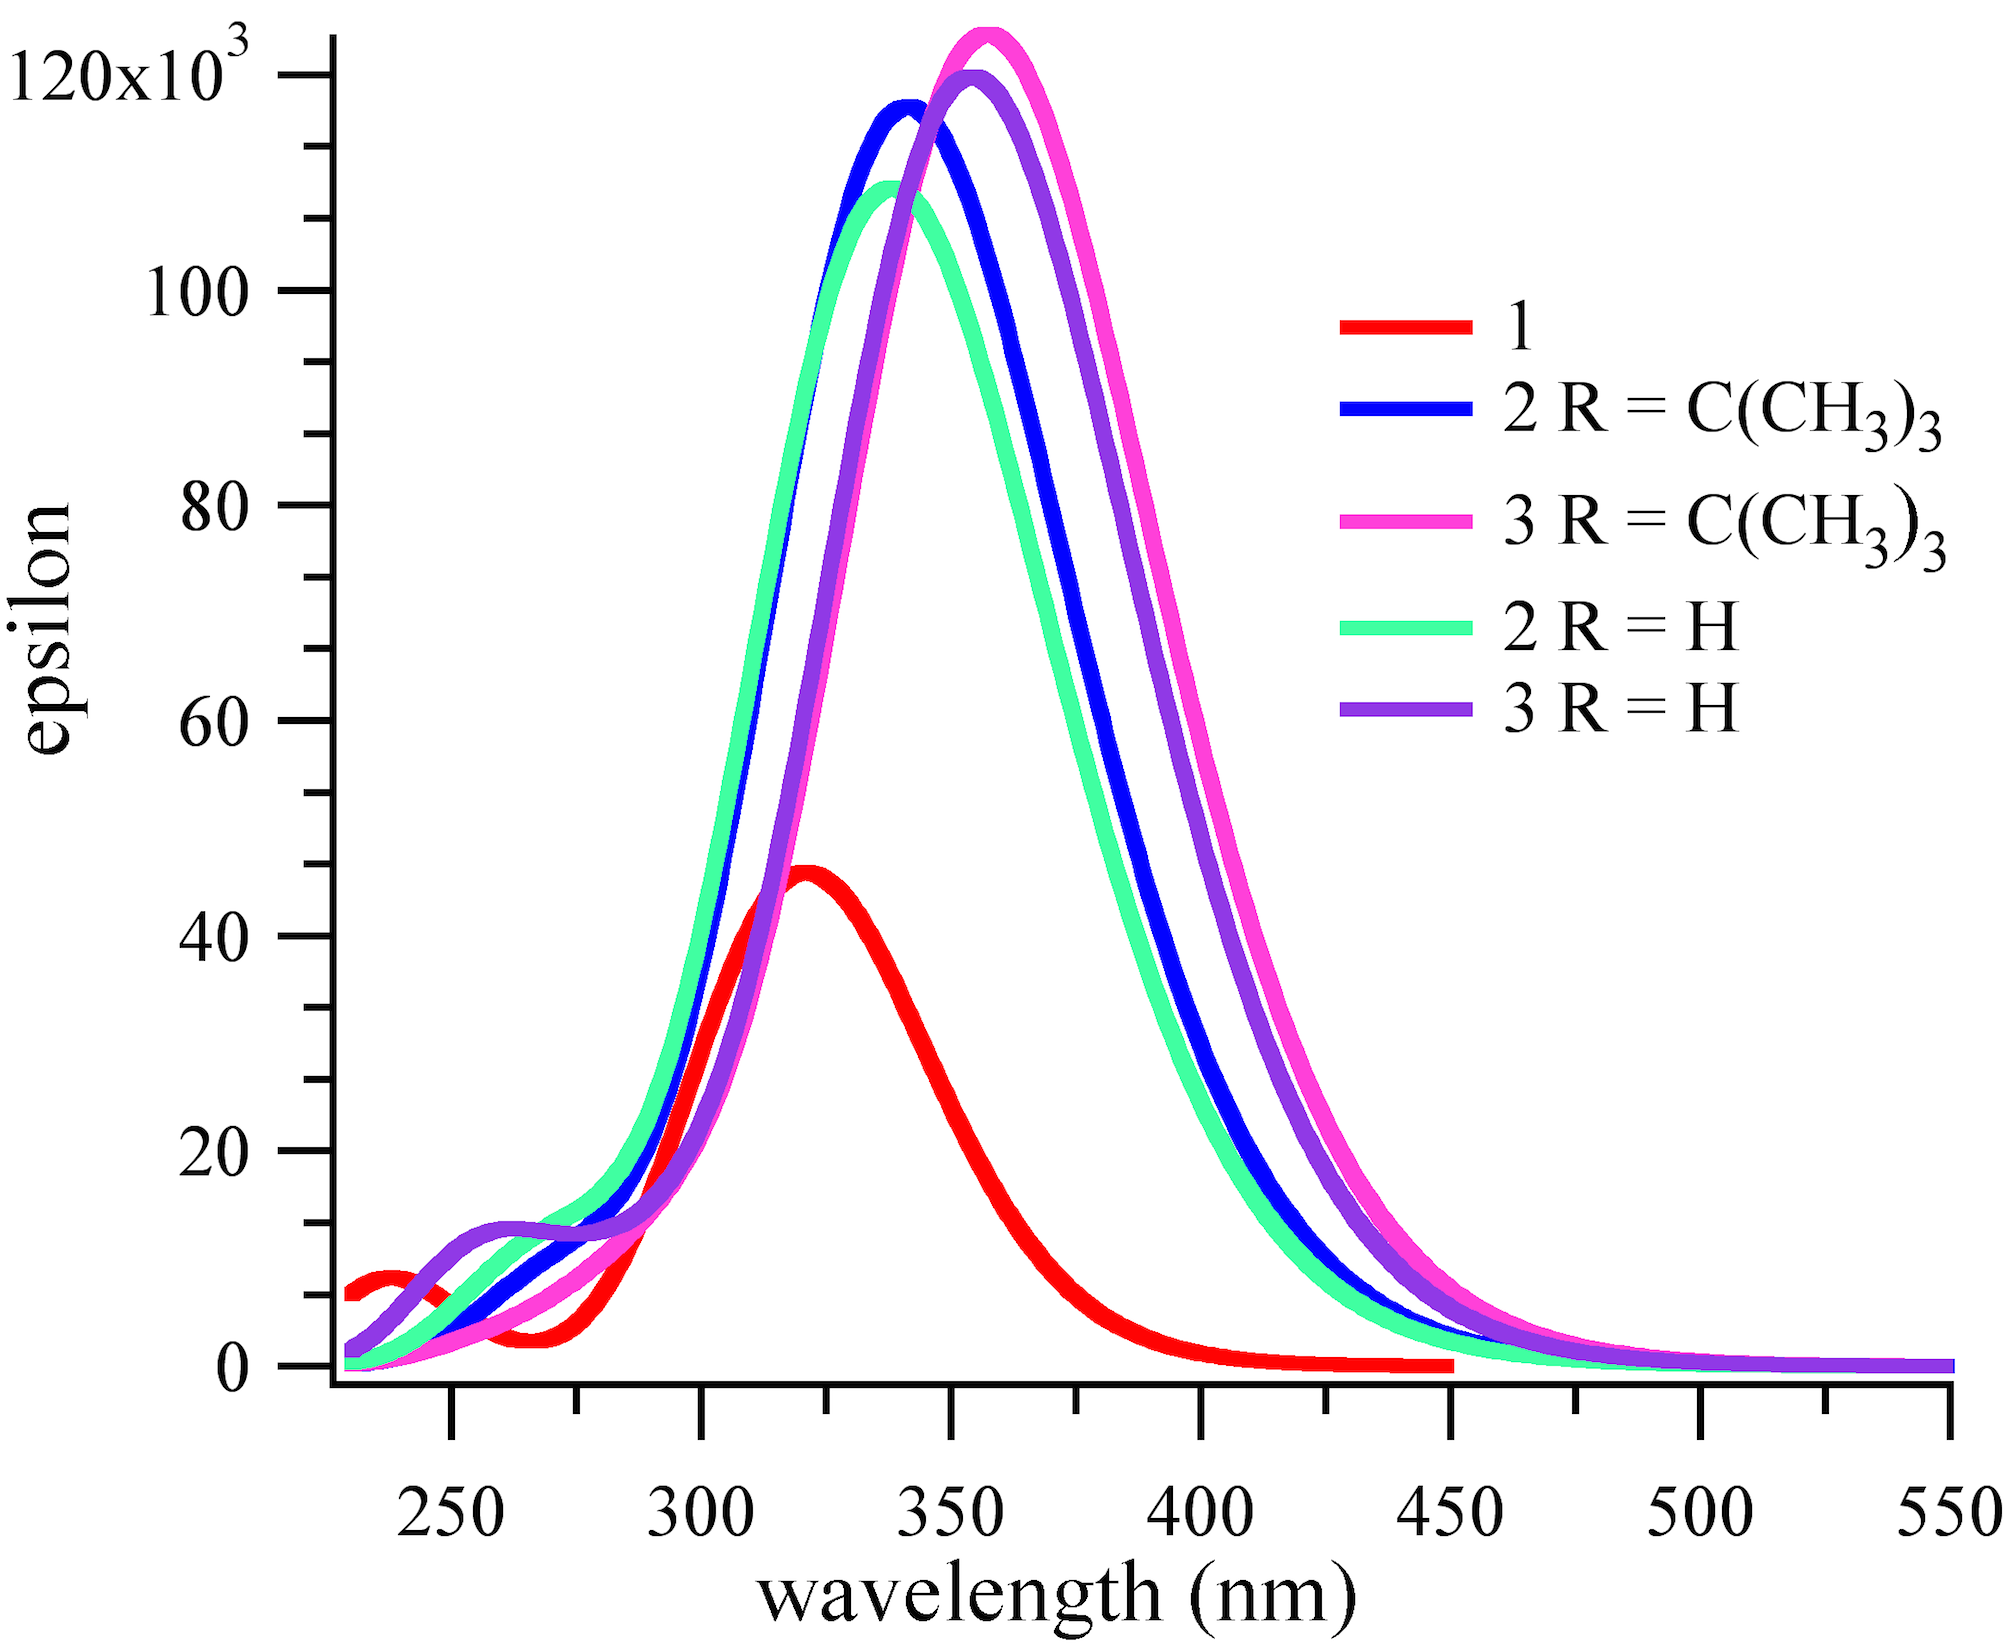


Fig. S6. PCM-TDDFT predicted UV-vis spectra for 1-3 and compare the results with R = H and with R = C(CH3)3 for 2 and 3.


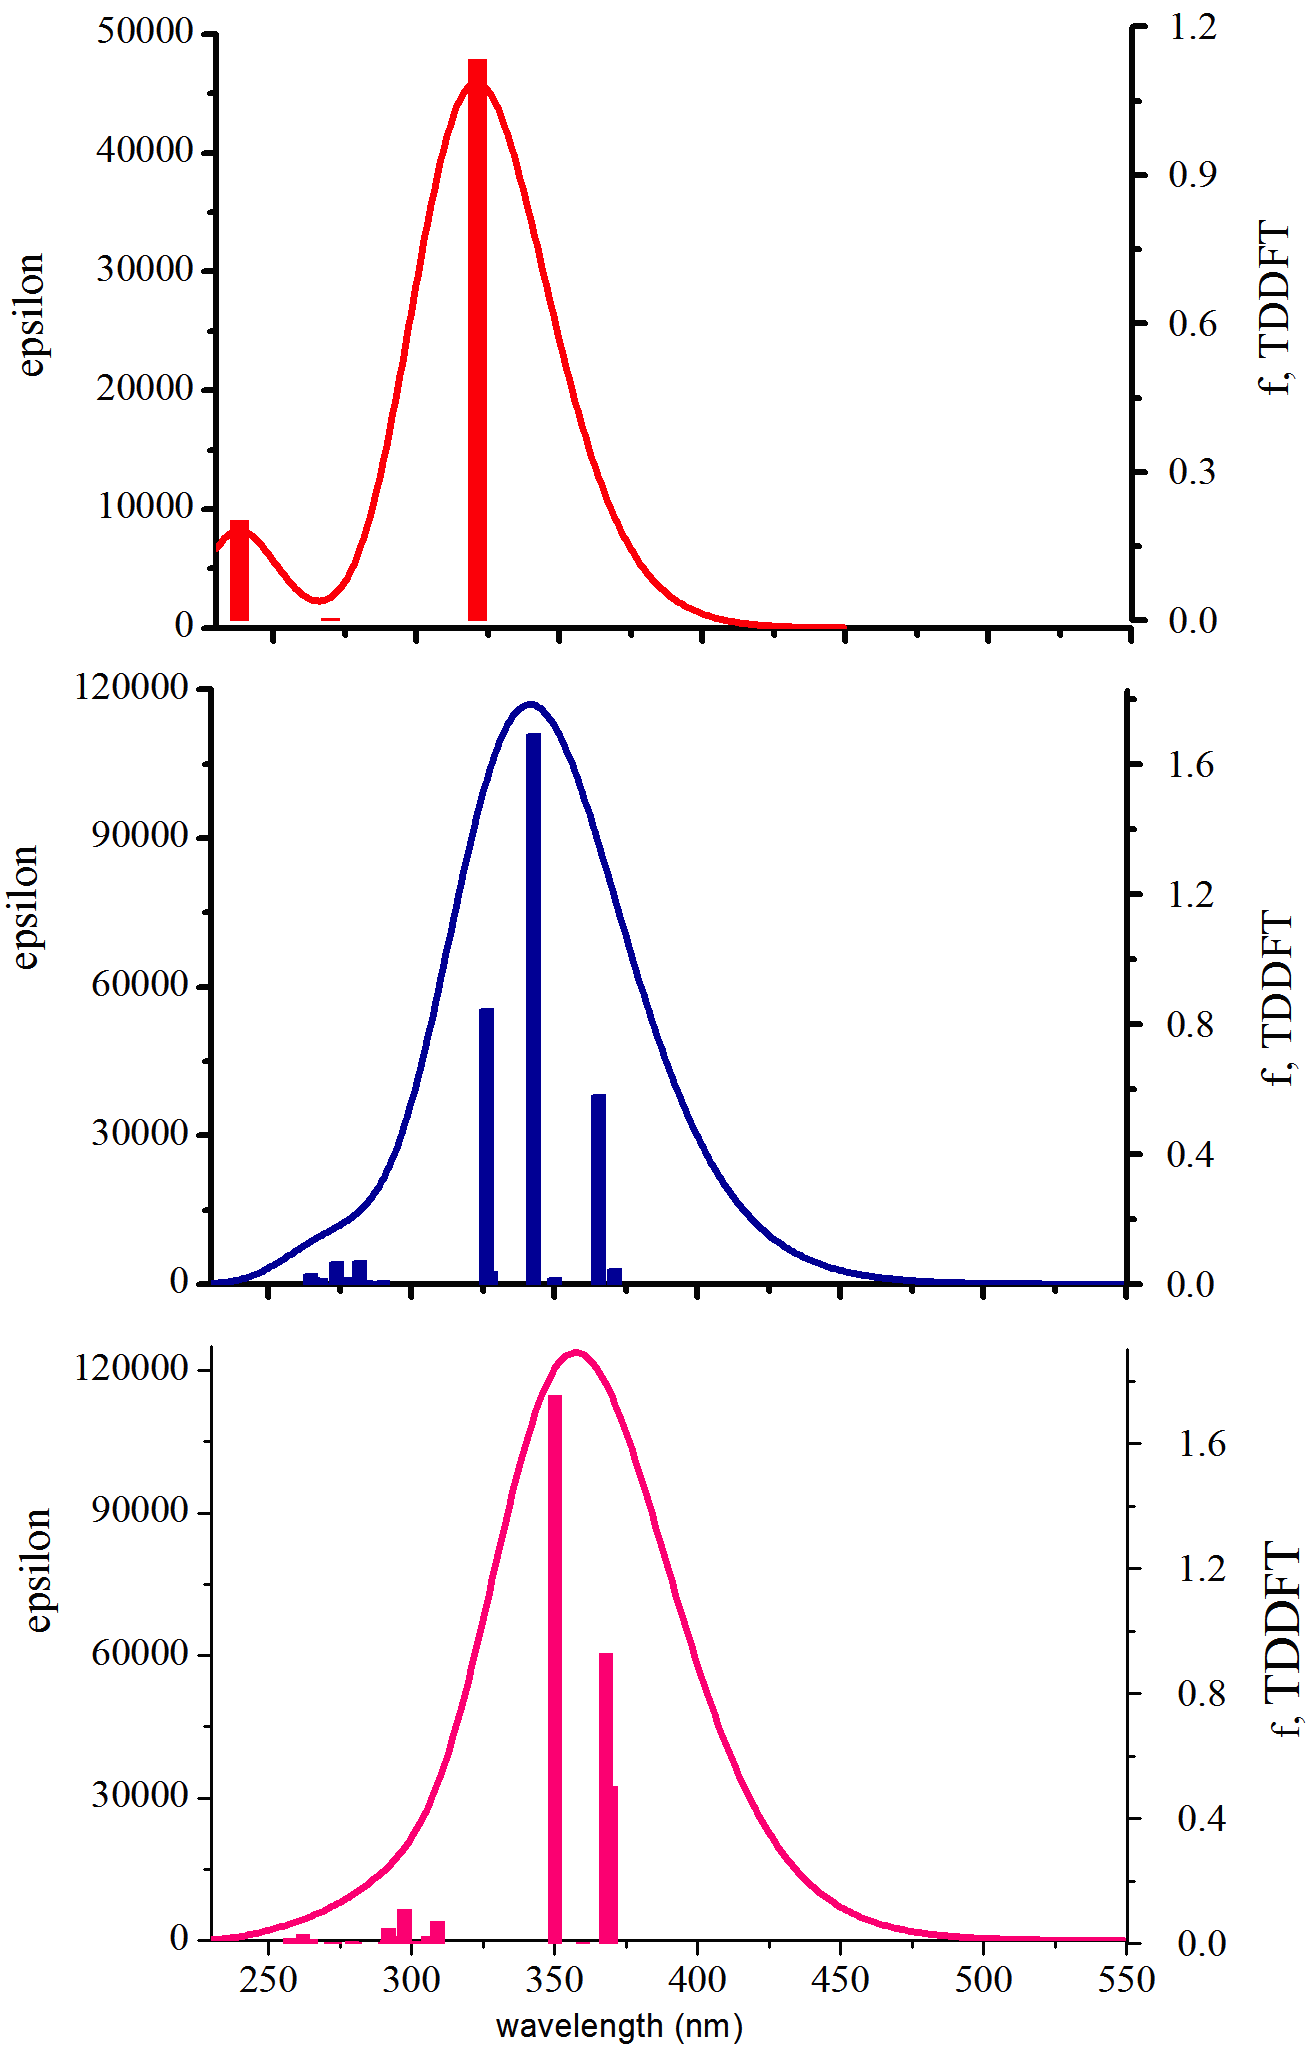


Fig. S7. PCM-TDDFT predicted UV-vis spectra for 1-3 showing the oscillator strength.


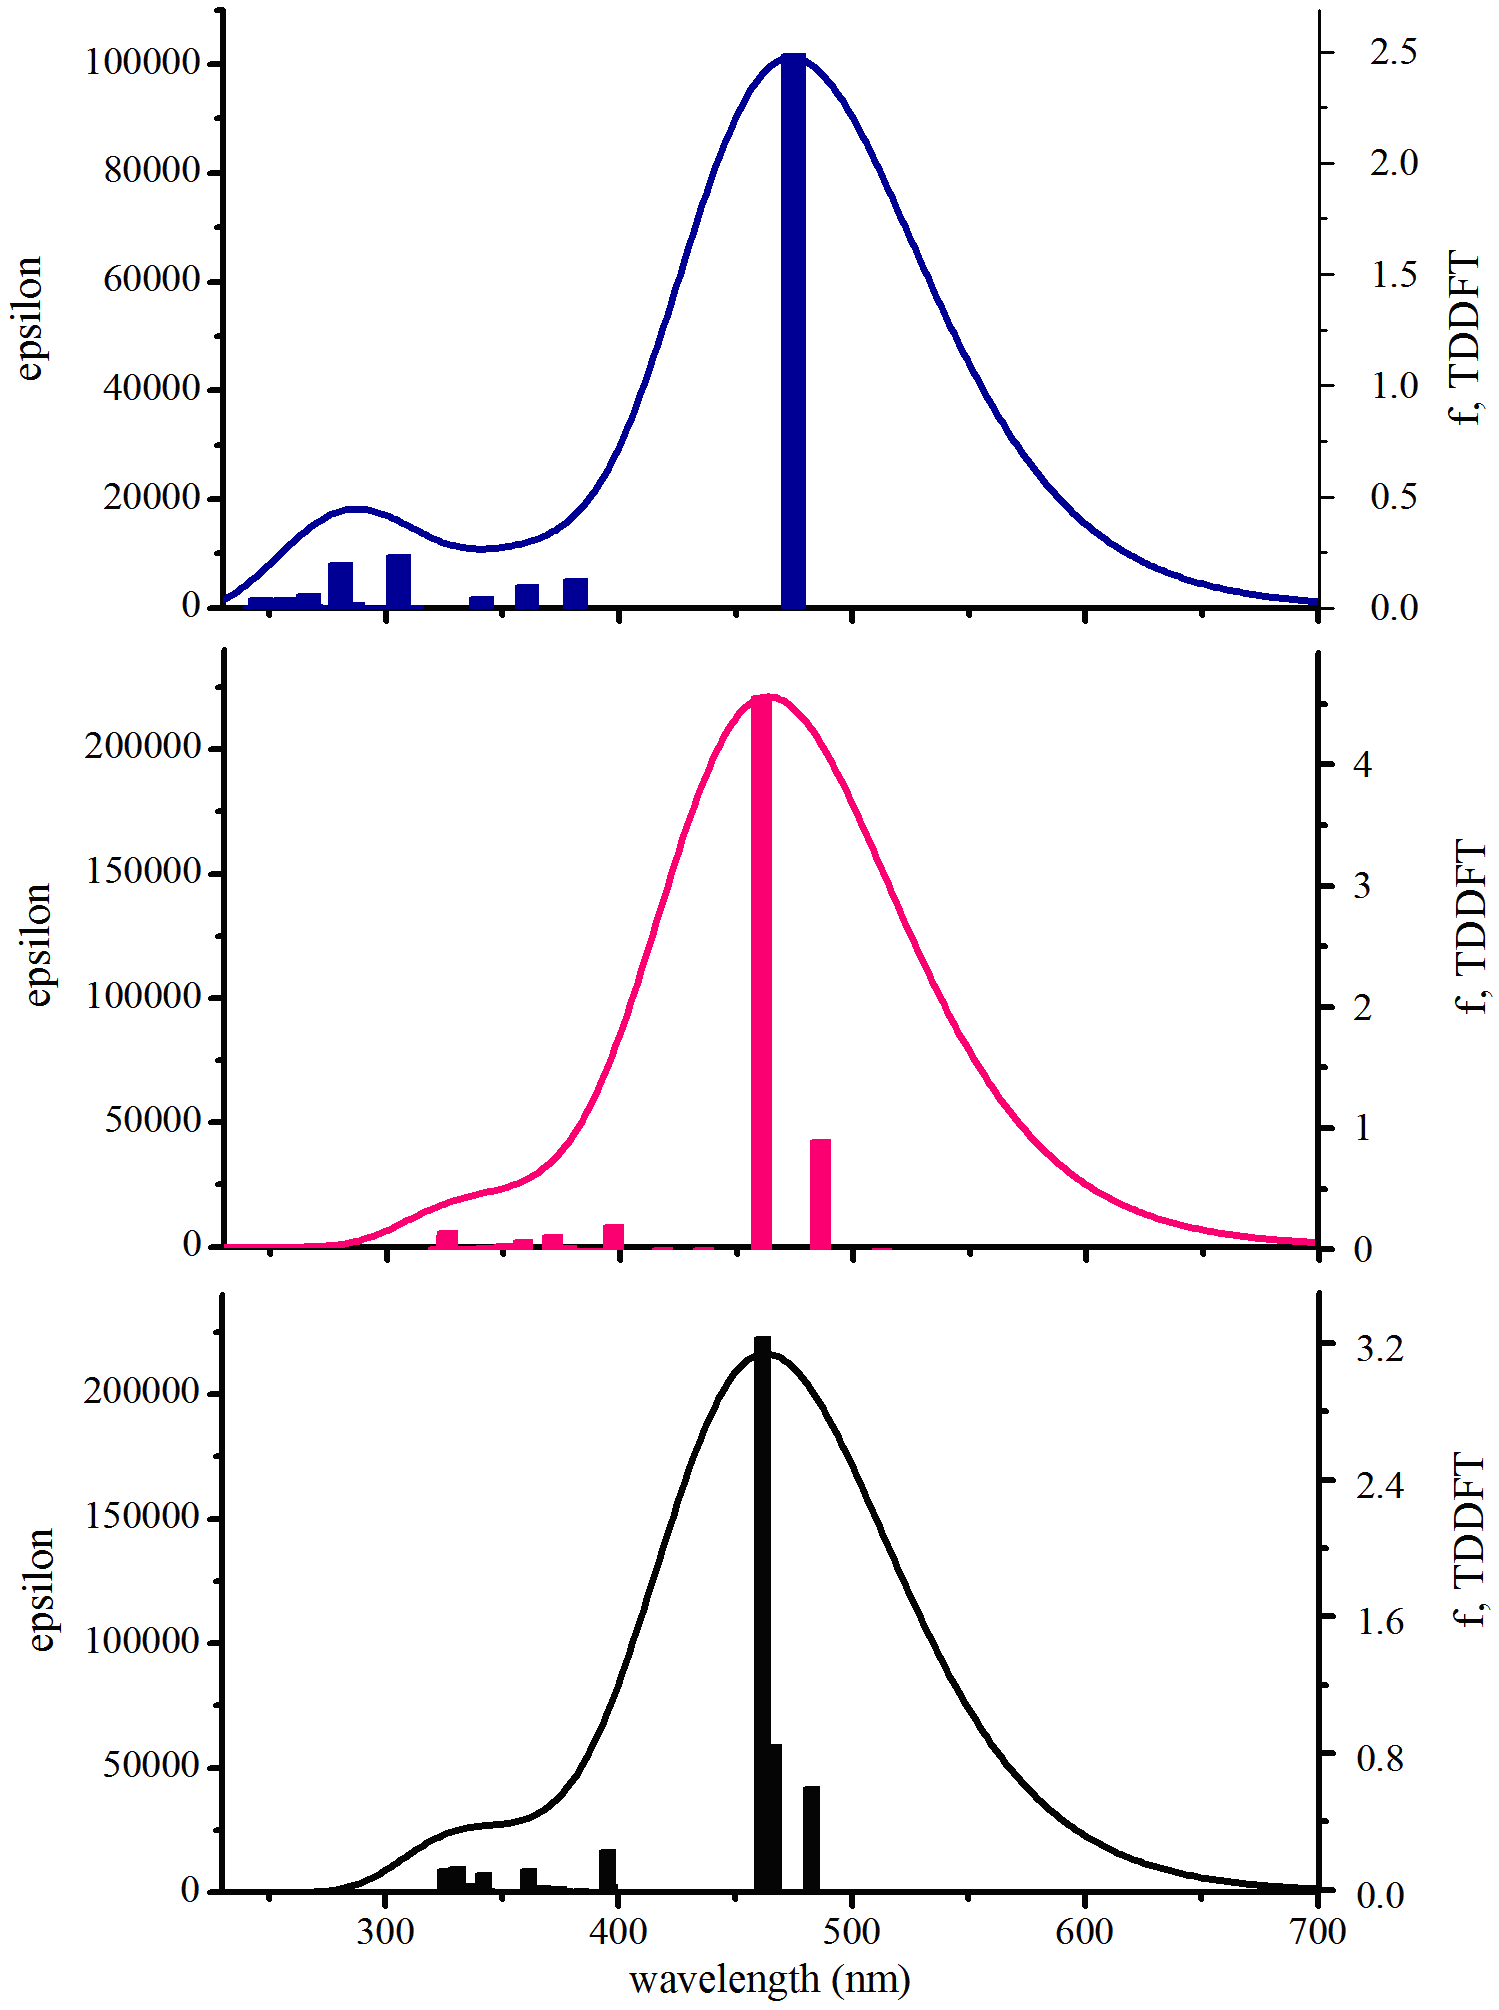


Fig. S8. PCM-TDDFT predicted UV-vis spectra for 4-6 showing the oscillator strength.


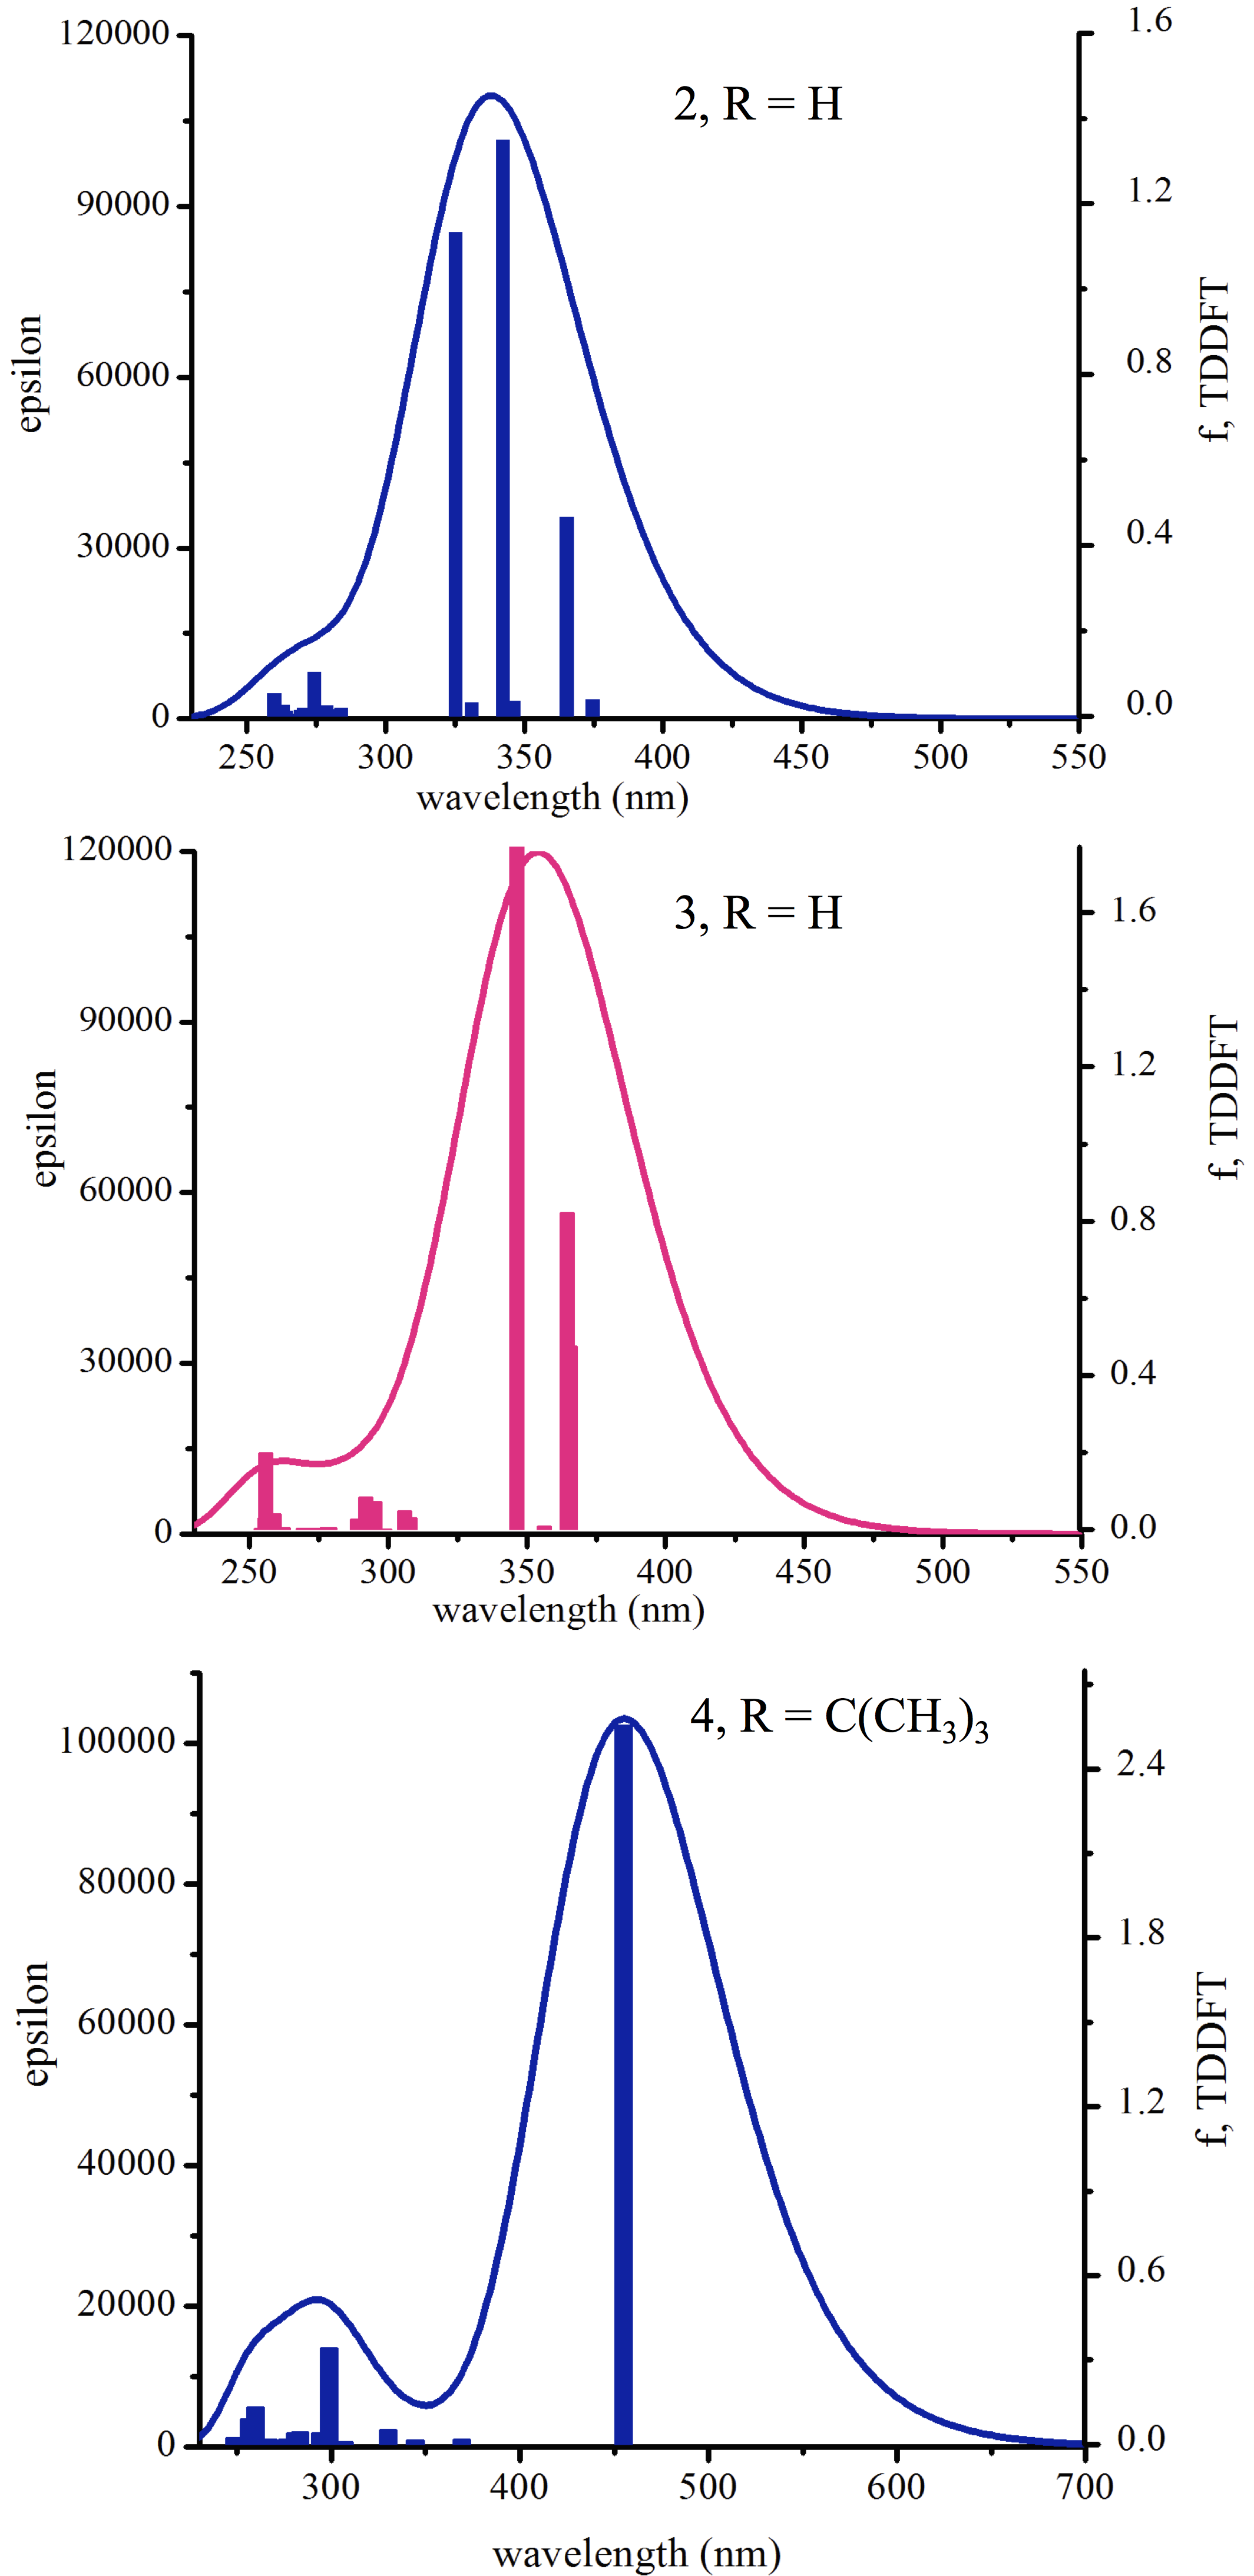


Fig. S9. PCM-TDDFT predicted UV-vis spectra for 2-4 showing the oscillator strength.

Fig. S10. PCM-DFT calculated frontier MO energies (eV) of compound 1.

Fig. S11. PCM-DFT calculated frontier MO energies (eV) of compound 2, R = C(CH3)3.

Fig. S12. PCM-DFT calculated frontier MO energies (eV) of compound 2, R = H.

Fig. S13. PCM-DFT calculated frontier MO energies (eV) of compound 3, R = C(CH3)3.

Fig. S14. PCM-DFT calculated frontier MO energies (eV) of compound 3, R = H.

Fig. S15. PCM-DFT calculated frontier MO energies (eV) of compound 4, R = H.

Fig. S16. PCM-DFT calculated frontier MO energies (eV) of compound 4, R = C(CH3)3.

Fig. S17. PCM-DFT calculated frontier MO energies (eV) of compound 5, R = H.

Fig. S18. PCM-DFT calculated frontier MO energies (eV) of compound 6, R = H.

**Table S1.** Gas-phase TD-DFT calculated electronic absorption parameters of compounds 1–6, including computed excitation wavelengths (λ), oscillator strengths (*f*), and dominant electronic transitions with % orbital contributions from TD-B3LYP/6-31+G(d)//B3LYP/6-31G(d) calculations.

| Compound | R group | Conformation | λ (nm) | *af* | Major Electronic Transition | Orbital Contribution (%)c |
| --- | --- | --- | --- | --- | --- | --- |
| 1 | – | – | 309.05  236.57  187.70 | 0.9886  0.1616  0.3968 | bH → L  H → L+1  H−2 → L+2 | 100.0  57.6  40.9 |
| 2 | H | syn | 361.71 | 0.1602 | H → L+1 | 81.0 |
| 336.26 | 0.8471 | H−1 → L | 33.2 |
| 326.74 | 0.1151 | H−2 → L | 79.2 |
| 317.05 | 1.4280 | H−2 → L+1 | 66.1 |
| 2 | H | anti | 359.32 | 0.1100 | H → L+1 | 77.3 |
| 344.59 | 0.3518 | H−1 → L | 47.5 |
| 334.34 | 0.4972 | H−1 → L+1 | 61.2 |
| 326.78 | 0.3599 | H−2 → L | 70.9 |
| 315.61 | 1.2992 | H−2 → L+1 | 67.6 |
| 2 | t-Bu | syn | 364.49 | 0.2595 | H → L+1 | 48.9 |
| 336.90 | 1.3716 | H−1 → L+1 | 53.2 |
| 319.77 | 1.1862 | H−2 → L | 56.0 |
| 2 | t-Bu | anti | 363.09 | 0.2281 | H → L+1 | 81.2 |
| 338.10 | 1.5124 | H−1 → L | 70.8 |
| 319.12 | 1.1046 | H−2 → L+1 | 83.6 |
| 3 | H | syn | 363.54 | 0.2961 | H → L | 85.5 |
| 360.74 | 0.2572 | H → L+1 | 100.0 |
| 356.51 | 0.1600 | H−1 → L | 100.0 |
| 337.52 | 1.9312 | H−1 → L+1 | 85.9 |
| 290.12 | 0.1316 | H−2 → L+1 | 50.0 |
| 3 | H | anti | 361.43 | 0.3183 | H → L | 86.9 |
| 357.05 | 0.3503 | H → L+1 | 100.0 |
| 354.52 | 0.1324 | H−1 → L | 100.0 |
| 335.43 | 1.8375 | H−1 → L+1 | 88.4 |
| 289.66 | 0.1331 | H−2 → L+1 | 53.6 |
| 3 | t-Bu | syn | 362.99 | 0.4271 | H → L | 90.7 |
| 360.83 | 0.4346 | H → L+1 | 50.7 |
| 338.55 | 1.8689 | H−1 → L+1 | 90.8 |
| 307.39 | 0.1177 | H → L+2 | 69.8 |
| 3 | t-Bu | anti | 365.15 | 0.3842 | H → L | 86.5 |
| 363.27 | 0.4158 | H−1 → L+1 | 73.2 |
| 340.65 | 1.9701 | H−1 → L+1 | 88.8 |
| 308.28 | 0.1261 | H → L+2 | 67.8 |
| 4 | H | – | 455.12 | 2.3443 | H → L | 100.0 |
| – | 350.99 | 0.1209 | H−2 → L | 54.6 |
| – | 302.96 | 0.2605 | H−1 → L+1 | 81.3 |
| – | 275.51 | 0.1382 | H−2 → L+1 | 27.7 |
| 4 | t-Bu | – | 437.21 | 2.2713 | H → L | 100.0 |
| – | 298.56 | 0.3260 | H−1 → L+1 | 78.7 |
| – | 255.80 | 0.1315 | H → L+6 | 30.8 |
| 5 | H | syn | 489.57 | 0.2966 | H → L+1 | 68.9 |
| 457.88 | 4.0618 | H−1 → L | 63.0 |
| 453.46 | 0.7200 | H−2 → L | 83.2 |
| 5 | H | anti | 484.49 | 0.1686 | H−1 → L | 62.2 |
| 452.74 | 4.8394 | H → L+1 | 62.1 |
| 423.01 | 0.1464 | H−2 → L | 88.5 |
| 400.17 | 0.1055 | H → L+2 | 75.5 |
| 350.79 | 0.2400 | H−5 → L+1 | 43.7 |
| 6 | H  H  H  H  H  H  H | syn  syn  syn  syn  syn  syn  syn | 480.87 | 0.6172 | H → L+1 | 41.5 |
| 464.07 | 1.3973 | H → L | 81.4 |
| 459.99 | 3.2486 | H−1 → L+1 | 87.4 |
| 393.71 | 0.2213 | H−2 → L | 24.3 |
| 360.37 | 0.1227 | H−1 → L+3 | 51.7 |
| 329.67 | 0.1314 | H−2 → L+2 | 53.6 |
| 324.97 | 0.1347 | H−5 → L | 44.2 |
| 6 | H | anti | 486.67 | 0.7193 | H−1 → L | 52.5 |
| 473.89 | 0.2417 | H → L | 100.0 |
| 467.82 | 4.1112 | H → L+1 | 52.2 |
| 461.92 | 0.2468 | H−1 → L+1 | 100.0 |
| 398.21 | 0.1259 | H−2 → L+1 | 41.1 |
| 365.00 | 0.1449 | H−1 → L+3 | 45.4 |
| 329.69 | 0.1487 | H−4 → L | 49.6 |
| 326.57 | 0.1882 | H−6 → L | 22.8 |

aO Str, oscillator strength.  Only transitions with oscillator strengths more than 0.1 are shown.

bH=HOMO and L=LUMO

c normalized contribution (%). The percentage of the individual contribution (contribution %) to the vertical excited states was calculated using the following expression2.

**6. Gas-TDDFT expansion coefficients for 1-6.**

**Compound 1**

Excited State 1: Singlet-A 4.0118 eV 309.05 nm f=0.9886 <S**2>=0.000

48 -> 49 0.70591

This state for optimization and/or second-order correction.

Total Energy, E(TD-HF/TD-KS) = -540.562532176

Copying the excited state density for this state as the 1-particle RhoCI density.

Excited State 2: Singlet-A 4.6046 eV 269.26 nm f=0.0065 <S**2>=0.000

47 -> 49 0.52808

48 -> 50 0.45387

Excited State 3: Singlet-A 4.6143 eV 268.70 nm f=0.0000 <S**2>=0.000

46 -> 49 0.53031

48 -> 51 -0.45022

Excited State 4: Singlet-A 5.1450 eV 240.98 nm f=0.0000 <S**2>=0.000

45 -> 49 0.54793

48 -> 51 -0.12812

48 -> 52 0.41913

Excited State 5: Singlet-A 5.2408 eV 236.57 nm f=0.0000 <S**2>=0.000

45 -> 49 0.12139

46 -> 49 0.44165

47 -> 52 -0.10579

48 -> 51 0.51060

Excited State 6: Singlet-A 5.2455 eV 236.36 nm f=0.1616 <S**2>=0.000

47 -> 49 -0.44672

48 -> 50 0.52070

Excited State 7: Singlet-A 5.8021 eV 213.69 nm f=0.0000 <S**2>=0.000

45 -> 49 -0.37077

46 -> 50 -0.22421

47 -> 51 0.21028

48 -> 52 0.51133

Excited State 8: Singlet-A 6.3265 eV 195.97 nm f=0.0000 <S**2>=0.000

45 -> 50 0.40941

46 -> 50 0.27671

47 -> 51 0.34152

47 -> 52 -0.33977

Excited State 9: Singlet-A 6.3460 eV 195.37 nm f=0.0164 <S**2>=0.000

44 -> 49 -0.13889

45 -> 51 0.43688

46 -> 51 -0.16883

46 -> 52 0.36342

47 -> 50 -0.32290

Excited State 10: Singlet-A 6.3825 eV 194.26 nm f=0.0481 <S**2>=0.000

44 -> 49 0.59758

45 -> 51 0.13106

46 -> 51 -0.20210

47 -> 50 0.10554

48 -> 53 -0.25237

Excited State 11: Singlet-A 6.4384 eV 192.57 nm f=0.0041 <S**2>=0.000

45 -> 51 0.21841

46 -> 51 0.42199

46 -> 52 0.27950

47 -> 50 0.43495

Excited State 12: Singlet-A 6.4544 eV 192.09 nm f=0.0000 <S**2>=0.000

45 -> 50 -0.30195

46 -> 50 0.42235

47 -> 51 0.36077

47 -> 52 0.30436

Excited State 13: Singlet-A 6.6054 eV 187.70 nm f=0.3968 <S**2>=0.000

44 -> 49 0.10896

45 -> 52 -0.21731

46 -> 51 0.44797

47 -> 50 -0.38412

48 -> 53 -0.28815

Excited State 14: Singlet-A 6.6315 eV 186.96 nm f=0.0000 <S**2>=0.000

43 -> 49 0.69333

Excited State 15: Singlet-A 6.8466 eV 181.09 nm f=0.0000 <S**2>=0.000

42 -> 49 0.69584

Excited State 16: Singlet-A 6.9641 eV 178.03 nm f=0.0001 <S**2>=0.000

41 -> 49 0.68997

43 -> 52 0.13235

Excited State 17: Singlet-A 7.0369 eV 176.19 nm f=0.0560 <S**2>=0.000

44 -> 49 -0.14329

45 -> 51 -0.29138

45 -> 52 0.38165

46 -> 52 0.29588

48 -> 53 -0.38067

Excited State 18: Singlet-A 7.0806 eV 175.10 nm f=0.0000 <S**2>=0.000

45 -> 49 0.18857

45 -> 50 0.14938

46 -> 50 -0.40160

47 -> 51 0.40533

47 -> 52 0.20862

48 -> 52 -0.20453

Excited State 19: Singlet-A 7.1779 eV 172.73 nm f=0.0000 <S**2>=0.000

44 -> 51 0.15794

45 -> 50 0.43093

46 -> 50 0.14732

47 -> 51 -0.18717

47 -> 52 0.43973

48 -> 52 0.10113

Excited State 20: Singlet-A 7.2075 eV 172.02 nm f=0.0000 <S**2>=0.000

48 -> 54 -0.40438

48 -> 56 0.57311

Excited State 1: Singlet-A 2.8435 eV 436.03 nm f=0.0182 <S**2>=0.000

73 -> 75 0.10520

74 -> 75 0.69179

**Compound 2- syn ( R =H)**

Excited State 1: Singlet-A 3.3200 eV 373.45 nm f=0.0349 <S**2>=0.000

182 ->183 0.69044

182 ->184 -0.11783

This state for optimization and/or second-order correction.

Total Energy, E(TD-HF/TD-KS) = -2048.67889871

Copying the excited state density for this state as the 1-particle RhoCI density.

Excited State 2: Singlet-A 3.4277 eV 361.71 nm f=0.1602 <S**2>=0.000

181 ->183 0.28539

181 ->184 -0.10665

182 ->184 0.62845

Excited State 3: Singlet-A 3.6002 eV 344.38 nm f=0.0882 <S**2>=0.000

180 ->183 -0.19740

181 ->183 0.37722

181 ->184 0.55332

Excited State 4: Singlet-A 3.6872 eV 336.26 nm f=0.8471 <S**2>=0.000

180 ->183 -0.20294

180 ->184 -0.30983

181 ->183 0.40291

181 ->184 -0.37854

182 ->184 -0.21571

Excited State 5: Singlet-A 3.7946 eV 326.74 nm f=0.1151 <S**2>=0.000

180 ->183 0.61470

180 ->184 -0.26482

181 ->183 0.16985

Excited State 6: Singlet-A 3.9105 eV 317.05 nm f=1.4280 <S**2>=0.000

180 ->183 0.17827

180 ->184 0.56609

181 ->183 0.27432

181 ->184 -0.15730

182 ->184 -0.18089

Excited State 7: Singlet-A 4.3513 eV 284.93 nm f=0.0074 <S**2>=0.000

177 ->183 0.18719

178 ->183 0.15834

179 ->183 -0.22599

182 ->185 0.50418

182 ->186 0.14694

182 ->189 -0.19415

Excited State 8: Singlet-A 4.3843 eV 282.79 nm f=0.0138 <S**2>=0.000

177 ->183 0.18628

179 ->183 -0.26578

179 ->184 0.18482

182 ->185 -0.34801

182 ->186 0.37536

182 ->189 -0.14823

Excited State 9: Singlet-A 4.4309 eV 279.82 nm f=0.0473 <S**2>=0.000

174 ->184 -0.11466

177 ->183 -0.30737

177 ->184 0.11169

180 ->186 0.12250

181 ->191 0.11159

182 ->185 0.12474

182 ->186 0.42106

182 ->187 -0.10341

182 ->189 0.30172

Excited State 10: Singlet-A 4.4418 eV 279.13 nm f=0.0033 <S**2>=0.000

174 ->183 0.18648

174 ->184 -0.11064

177 ->183 0.10891

177 ->184 0.39298

179 ->183 -0.15249

179 ->184 -0.25558

181 ->185 -0.12749

181 ->189 0.27560

182 ->191 0.23617

Excited State 11: Singlet-A 4.5150 eV 274.61 nm f=0.0491 <S**2>=0.000

173 ->183 -0.15964

175 ->183 0.11960

175 ->184 0.10482

177 ->183 0.15957

179 ->183 0.20893

179 ->184 -0.20359

181 ->185 0.29293

181 ->188 0.13726

182 ->186 0.21947

182 ->187 0.33654

Excited State 12: Singlet-A 4.5238 eV 274.07 nm f=0.0063 <S**2>=0.000

173 ->183 0.17309

173 ->184 0.16474

175 ->183 -0.34598

175 ->184 0.17486

179 ->183 0.12808

180 ->188 -0.14464

181 ->190 0.19752

182 ->188 0.37679

Excited State 13: Singlet-A 4.5585 eV 271.99 nm f=0.0087 <S**2>=0.000

173 ->183 0.17335

174 ->183 0.10012

175 ->184 -0.33437

177 ->183 0.11698

179 ->183 0.35394

180 ->190 0.10061

181 ->188 -0.26899

182 ->186 0.12400

182 ->189 -0.10482

182 ->190 -0.22047

Excited State 14: Singlet-A 4.5808 eV 270.66 nm f=0.0152 <S**2>=0.000

173 ->183 0.15087

175 ->184 -0.19269

178 ->184 -0.12603

179 ->183 -0.30297

179 ->184 -0.13357

181 ->188 -0.14644

182 ->187 0.43883

182 ->189 0.13542

182 ->190 -0.12836

Excited State 15: Singlet-A 4.6337 eV 267.57 nm f=0.0053 <S**2>=0.000

177 ->184 0.16873

179 ->184 0.45227

180 ->185 0.13470

181 ->185 -0.23473

181 ->187 -0.25110

182 ->187 0.26481

Excited State 16: Singlet-A 4.6621 eV 265.94 nm f=0.0045 <S**2>=0.000

178 ->183 0.49519

179 ->183 0.12491

180 ->185 -0.27523

181 ->185 -0.19759

181 ->186 0.18055

181 ->187 0.16149

182 ->187 0.14082

Excited State 17: Singlet-A 4.6901 eV 264.35 nm f=0.0286 <S**2>=0.000

174 ->184 -0.10627

177 ->183 0.16819

177 ->184 0.10092

178 ->183 0.14669

179 ->183 -0.16957

179 ->184 0.22372

181 ->185 0.43190

182 ->189 0.28267

Excited State 18: Singlet-A 4.7196 eV 262.70 nm f=0.0036 <S**2>=0.000

176 ->183 -0.17992

177 ->183 -0.16583

177 ->184 0.11336

178 ->183 -0.24046

178 ->184 -0.28851

180 ->185 -0.19517

181 ->186 0.35026

182 ->185 0.17478

182 ->189 -0.13253

Excited State 19: Singlet-A 4.7495 eV 261.05 nm f=0.0066 <S**2>=0.000

174 ->183 -0.12702

176 ->183 -0.27477

177 ->183 0.14572

178 ->183 -0.13359

178 ->184 0.47607

180 ->187 0.12110

181 ->186 0.22547

181 ->187 -0.12619

182 ->185 0.12065

Excited State 20: Singlet-A 4.7760 eV 259.60 nm f=0.0300 <S**2>=0.000

174 ->183 -0.25443

177 ->183 0.37713

178 ->184 -0.23634

180 ->186 -0.21223

180 ->187 -0.14019

181 ->185 -0.22302

182 ->187 -0.10954

182 ->188 -0.10495

182 ->189 0.20922

**Compound 2- syn (R =C(CH3)3)**

Excited State 1: Singlet-A 3.3457 eV 370.58 nm f=0.0379 <S**2>=0.000

246 -> 247 -0.44509

246 -> 248 0.54272

This state for optimization and/or second-order correction.

Total Energy, E(TD-HF/TD-KS) = -2677.69647110

Copying the excited state density for this state as the 1-particle RhoCI density.

Excited State 2: Singlet-A 3.4016 eV 364.49 nm f=0.2595 <S**2>=0.000

245 -> 247 -0.14132

245 -> 248 0.24679

246 -> 247 0.49235

246 -> 248 0.41470

Excited State 3: Singlet-A 3.5465 eV 349.59 nm f=0.0193 <S**2>=0.000

245 -> 247 0.60785

245 -> 248 0.33968

Excited State 4: Singlet-A 3.6801 eV 336.90 nm f=1.3716 <S**2>=0.000

244 -> 247 -0.28072

244 -> 248 -0.14194

245 -> 247 -0.27845

245 -> 248 0.51176

246 -> 247 -0.18944

246 -> 248 -0.13551

Excited State 5: Singlet-A 3.8329 eV 323.47 nm f=0.0241 <S**2>=0.000

244 -> 247 -0.36902

244 -> 248 0.58292

245 -> 247 0.10071

Excited State 6: Singlet-A 3.8773 eV 319.77 nm f=1.1862 <S**2>=0.000

244 -> 247 0.51803

244 -> 248 0.34540

245 -> 247 -0.12860

245 -> 248 0.23808

246 -> 247 -0.13463

Excited State 7: Singlet-A 4.3045 eV 288.04 nm f=0.0055 <S**2>=0.000

242 -> 247 0.13706

243 -> 247 0.55338

243 -> 248 -0.15834

245 -> 253 0.19275

246 -> 249 0.16307

246 -> 253 0.17543

Excited State 8: Singlet-A 4.3419 eV 285.55 nm f=0.0003 <S**2>=0.000

239 -> 248 -0.10114

240 -> 248 -0.11705

241 -> 247 -0.12774

242 -> 248 0.22117

243 -> 247 -0.14972

244 -> 249 0.10115

245 -> 250 0.10624

246 -> 249 0.54289

Excited State 9: Singlet-A 4.3537 eV 284.78 nm f=0.0063 <S**2>=0.000

242 -> 247 0.14532

242 -> 248 0.50504

243 -> 248 -0.20699

245 -> 254 -0.17800

246 -> 249 -0.23047

246 -> 254 0.19711

Excited State 10: Singlet-A 4.3686 eV 283.81 nm f=0.0651 <S**2>=0.000

241 -> 248 0.20660

244 -> 250 0.15433

246 -> 250 0.59303

Excited State 11: Singlet-A 4.4303 eV 279.85 nm f=0.0137 <S**2>=0.000

237 -> 247 -0.18551

237 -> 248 -0.11242

239 -> 247 0.18599

239 -> 248 -0.32568

241 -> 248 0.15515

245 -> 255 -0.17553

246 -> 249 -0.11620

246 -> 250 -0.16049

246 -> 252 0.41395

Excited State 12: Singlet-A 4.4469 eV 278.81 nm f=0.0037 <S**2>=0.000

237 -> 247 -0.11337

237 -> 248 0.19479

239 -> 247 0.35096

239 -> 248 0.19834

241 -> 247 -0.24654

245 -> 249 0.15547

245 -> 252 0.28900

246 -> 251 0.11141

246 -> 255 -0.25916

Excited State 13: Singlet-A 4.5158 eV 274.55 nm f=0.0378 <S**2>=0.000

239 -> 247 -0.15232

240 -> 247 0.16155

241 -> 248 0.32706

245 -> 249 0.37561

245 -> 252 -0.10091

246 -> 250 -0.18276

246 -> 251 0.33954

Excited State 14: Singlet-A 4.5452 eV 272.78 nm f=0.0000 <S**2>=0.000

242 -> 248 0.22049

243 -> 247 0.17783

243 -> 248 0.63714

Excited State 15: Singlet-A 4.5886 eV 270.20 nm f=0.0073 <S**2>=0.000

240 -> 247 0.12827

241 -> 247 0.30818

241 -> 248 -0.10453

245 -> 249 -0.31342

246 -> 251 0.47602

Excited State 16: Singlet-A 4.5966 eV 269.73 nm f=0.0000 <S**2>=0.000

242 -> 247 0.65051

242 -> 248 -0.17830

243 -> 247 -0.17770

Excited State 17: Singlet-A 4.6108 eV 268.90 nm f=0.0054 <S**2>=0.000

239 -> 247 0.13525

241 -> 247 0.45900

241 -> 248 0.22088

245 -> 249 0.19382

245 -> 251 -0.27079

246 -> 251 -0.20124

Excited State 18: Singlet-A 4.6484 eV 266.72 nm f=0.0113 <S**2>=0.000

240 -> 247 -0.16428

240 -> 248 0.18822

241 -> 247 -0.10932

244 -> 249 0.29401

245 -> 249 -0.13608

245 -> 250 0.48963

246 -> 249 -0.12447

Excited State 19: Singlet-A 4.6703 eV 265.48 nm f=0.0196 <S**2>=0.000

240 -> 247 -0.13917

240 -> 248 -0.15688

241 -> 247 -0.14176

241 -> 248 0.42655

245 -> 249 -0.34711

245 -> 250 -0.14333

246 -> 250 -0.10821

246 -> 252 -0.18512

Excited State 20: Singlet-A 4.7112 eV 263.17 nm f=0.0049 <S**2>=0.000

240 -> 247 0.53403

244 -> 250 0.16485

244 -> 251 -0.13131

245 -> 250 0.17556

245 -> 251 0.12950

246 -> 251 -0.15041

246 -> 252 -0.14183

**Compound 2- anti (R =C(CH3)3)**

Excited State 1: Singlet-A 3.3398 eV 371.23 nm f=0.0401 <S**2>=0.000

246 -> 247 0.69038

246 -> 248 -0.12391

This state for optimization and/or second-order correction.

Total Energy, E(TD-HF/TD-KS) = -2677.69630427

Copying the excited state density for this state as the 1-particle RhoCI density.

Excited State 2: Singlet-A 3.4147 eV 363.09 nm f=0.2281 <S**2>=0.000

245 -> 247 -0.30212

246 -> 248 0.62760

Excited State 3: Singlet-A 3.5637 eV 347.91 nm f=0.0187 <S**2>=0.000

244 -> 247 0.10358

245 -> 248 0.69025

Excited State 4: Singlet-A 3.6671 eV 338.10 nm f=1.5124 <S**2>=0.000

244 -> 248 0.28183

245 -> 247 0.58423

246 -> 248 0.24731

Excited State 5: Singlet-A 3.8146 eV 325.03 nm f=0.0012 <S**2>=0.000

244 -> 247 0.68969

245 -> 248 -0.10005

Excited State 6: Singlet-A 3.8852 eV 319.12 nm f=1.1046 <S**2>=0.000

244 -> 248 0.63610

245 -> 247 -0.23349

246 -> 248 -0.15800

Excited State 7: Singlet-A 4.3110 eV 287.60 nm f=0.0051 <S**2>=0.000

243 -> 247 0.42766

243 -> 248 -0.41970

244 -> 253 -0.10829

245 -> 253 -0.22388

246 -> 249 -0.12450

246 -> 253 0.17397

Excited State 8: Singlet-A 4.3498 eV 285.03 nm f=0.0064 <S**2>=0.000

240 -> 247 0.13664

242 -> 247 0.12577

242 -> 248 0.13221

244 -> 249 0.11366

246 -> 249 0.57921

246 -> 250 -0.17140

Excited State 9: Singlet-A 4.3676 eV 283.87 nm f=0.0561 <S**2>=0.000

239 -> 247 0.12125

242 -> 247 -0.19612

244 -> 250 0.14476

246 -> 249 0.15996

246 -> 250 0.55552

246 -> 252 0.11696

Excited State 10: Singlet-A 4.3919 eV 282.30 nm f=0.0048 <S**2>=0.000

241 -> 247 0.45218

241 -> 248 0.35706

245 -> 254 -0.18038

246 -> 249 -0.12582

246 -> 254 -0.23325

Excited State 11: Singlet-A 4.4239 eV 280.26 nm f=0.0050 <S**2>=0.000

237 -> 248 0.20297

239 -> 247 0.38380

245 -> 249 0.11004

245 -> 255 0.16489

246 -> 250 -0.16966

246 -> 251 -0.20435

246 -> 252 0.37946

Excited State 12: Singlet-A 4.4606 eV 277.95 nm f=0.0015 <S**2>=0.000

237 -> 247 0.24400

239 -> 248 0.39550

242 -> 248 -0.24743

245 -> 252 0.31401

246 -> 255 0.26137

Excited State 13: Singlet-A 4.5084 eV 275.01 nm f=0.0525 <S**2>=0.000

240 -> 248 0.13924

241 -> 247 -0.10908

242 -> 247 0.38840

245 -> 249 0.38225

246 -> 250 0.21844

246 -> 251 -0.28852

246 -> 252 -0.10296

Excited State 14: Singlet-A 4.5699 eV 271.31 nm f=0.0003 <S**2>=0.000

243 -> 247 0.50567

243 -> 248 0.48079

Excited State 15: Singlet-A 4.5955 eV 269.79 nm f=0.0165 <S**2>=0.000

240 -> 248 -0.13150

242 -> 247 0.16770

242 -> 248 -0.23316

245 -> 249 0.32086

246 -> 251 0.48415

246 -> 252 0.11862

Excited State 16: Singlet-A 4.6236 eV 268.16 nm f=0.0123 <S**2>=0.000

239 -> 248 0.11061

242 -> 248 0.48745

244 -> 249 -0.15699

245 -> 249 0.15042

245 -> 250 0.18770

245 -> 251 -0.30203

246 -> 251 0.18529

Excited State 17: Singlet-A 4.6491 eV 266.69 nm f=0.0098 <S**2>=0.000

240 -> 247 0.23244

241 -> 247 0.10521

241 -> 248 -0.12815

242 -> 247 0.22551

242 -> 248 -0.15490

244 -> 249 -0.20801

245 -> 249 -0.26834

245 -> 250 0.38092

Excited State 18: Singlet-A 4.6607 eV 266.02 nm f=0.0137 <S**2>=0.000

240 -> 247 -0.13683

240 -> 248 -0.14449

241 -> 248 -0.10437

242 -> 247 0.39633

244 -> 249 0.13544

245 -> 249 -0.26297

245 -> 250 -0.27940

245 -> 251 -0.10470

246 -> 249 -0.16096

246 -> 252 0.18872

Excited State 19: Singlet-A 4.6723 eV 265.36 nm f=0.0003 <S**2>=0.000

241 -> 247 -0.42761

241 -> 248 0.51479

245 -> 249 -0.11081

Excited State 20: Singlet-A 4.7154 eV 262.93 nm f=0.0076 <S**2>=0.000

240 -> 247 0.47838

240 -> 248 -0.15246

242 -> 248 -0.14550

244 -> 249 -0.12182

245 -> 250 -0.29486

245 -> 251 -0.21739

246 -> 249 -0.13503

**Compound 3- Syn (R = H)**

Excited State 1: Singlet-A 3.4105 eV 363.54 nm f=0.2961 <S**2>=0.000

137 ->140 0.26622

138 ->139 0.64634

This state for optimization and/or second-order correction.

Total Energy, E(TD-HF/TD-KS) = -1616.24065761

Copying the excited state density for this state as the 1-particle RhoCI density.

Excited State 2: Singlet-A 3.4369 eV 360.74 nm f=0.2572 <S**2>=0.000

138 ->140 0.69858

Excited State 3: Singlet-A 3.4777 eV 356.51 nm f=0.1600 <S**2>=0.000

137 ->139 0.70028

Excited State 4: Singlet-A 3.6734 eV 337.52 nm f=1.9328 <S**2>=0.000

137 ->140 0.65006

138 ->139 -0.26293

Excited State 5: Singlet-A 4.0194 eV 308.46 nm f=0.0636 <S**2>=0.000

136 ->140 -0.45090

138 ->141 0.50747

Excited State 6: Singlet-A 4.0552 eV 305.74 nm f=0.0212 <S**2>=0.000

136 ->139 0.60439

137 ->141 0.31735

Excited State 7: Singlet-A 4.1359 eV 299.77 nm f=0.0002 <S**2>=0.000

135 ->139 0.58453

136 ->140 0.20555

137 ->142 0.10036

138 ->141 0.29820

Excited State 8: Singlet-A 4.1946 eV 295.58 nm f=0.0637 <S**2>=0.000

135 ->140 -0.36986

136 ->139 -0.30487

137 ->141 0.49787

Excited State 9: Singlet-A 4.2736 eV 290.12 nm f=0.1316 <S**2>=0.000

135 ->139 -0.32320

136 ->140 0.48588

137 ->142 -0.10738

138 ->141 0.34710

Excited State 10: Singlet-A 4.3098 eV 287.68 nm f=0.0387 <S**2>=0.000

135 ->140 0.57082

136 ->139 -0.10622

137 ->141 0.36478

Excited State 11: Singlet-A 4.4303 eV 279.85 nm f=0.0034 <S**2>=0.000

130 ->139 0.26500

130 ->140 0.22929

131 ->139 -0.20351

131 ->140 -0.16465

132 ->139 0.18368

132 ->140 0.15555

133 ->139 0.12395

137 ->143 0.22736

137 ->145 0.15037

138 ->142 0.10807

138 ->143 -0.24664

138 ->144 0.10415

138 ->145 -0.17430

Excited State 12: Singlet-A 4.4390 eV 279.31 nm f=0.0063 <S**2>=0.000

130 ->139 0.26061

130 ->140 -0.23360

131 ->139 0.18464

131 ->140 -0.16734

132 ->139 -0.13835

132 ->140 0.12774

133 ->139 -0.16365

133 ->140 0.14941

137 ->143 -0.18360

137 ->144 -0.14769

137 ->145 0.10494

138 ->143 -0.23197

138 ->144 -0.18585

138 ->145 0.12842

138 ->146 0.10667

Excited State 13: Singlet-A 4.5246 eV 274.02 nm f=0.0007 <S**2>=0.000

131 ->139 -0.23766

132 ->140 -0.23997

133 ->139 -0.25516

133 ->140 0.25723

134 ->139 -0.14999

137 ->144 0.17387

137 ->145 0.19957

138 ->142 -0.20329

138 ->146 -0.24487

Excited State 14: Singlet-A 4.5284 eV 273.79 nm f=0.0026 <S**2>=0.000

131 ->139 0.14338

131 ->140 0.26977

132 ->139 0.31305

132 ->140 0.14421

133 ->139 -0.17016

133 ->140 0.19710

137 ->142 -0.10494

137 ->146 -0.25559

138 ->144 0.20925

138 ->145 0.18737

Excited State 15: Singlet-A 4.5829 eV 270.54 nm f=0.0012 <S**2>=0.000

131 ->139 -0.11434

132 ->140 -0.12358

133 ->139 -0.11205

134 ->139 0.42517

136 ->141 0.17691

137 ->147 0.10776

138 ->142 0.41054

138 ->146 -0.10967

Excited State 16: Singlet-A 4.7121 eV 263.12 nm f=0.0047 <S**2>=0.000

134 ->140 0.48648

135 ->139 0.13021

135 ->141 0.10783

137 ->142 -0.39653

138 ->147 -0.17013

Excited State 17: Singlet-A 4.7928 eV 258.69 nm f=0.0040 <S**2>=0.000

134 ->139 0.46846

138 ->142 -0.46299

Excited State 18: Singlet-A 4.8404 eV 256.15 nm f=0.0237 <S**2>=0.000

129 ->139 -0.14717

130 ->139 0.14227

130 ->140 0.18634

131 ->139 0.14680

132 ->139 -0.12315

133 ->139 -0.11600

135 ->141 0.47786

136 ->142 -0.16269

137 ->142 0.21425

Excited State 19: Singlet-A 4.8445 eV 255.93 nm f=0.0236 <S**2>=0.000

130 ->139 -0.25056

130 ->140 -0.26759

131 ->139 -0.22149

131 ->140 -0.13085

132 ->139 0.14437

133 ->139 0.21111

133 ->140 0.10584

134 ->140 -0.14293

135 ->141 0.35404

136 ->141 0.11192

136 ->142 -0.10604

Excited State 20: Singlet-A 4.8609 eV 255.06 nm f=0.0091 <S**2>=0.000

130 ->139 0.39066

130 ->140 -0.27089

131 ->139 -0.21800

131 ->140 0.26009

132 ->139 0.14953

132 ->140 -0.22548

133 ->140 -0.15754

136 ->141 -0.13342

**Compound 3- anti (R = H)**

Excited State 1: Singlet-A 3.4304 eV 361.43 nm f=0.3183 <S**2>=0.000

137 ->140 0.22878

138 ->139 0.65308

138 ->140 0.11090

This state for optimization and/or second-order correction.

Total Energy, E(TD-HF/TD-KS) = -1616.23862015

Copying the excited state density for this state as the 1-particle RhoCI density.

Excited State 2: Singlet-A 3.4725 eV 357.05 nm f=0.3503 <S**2>=0.000

138 ->140 0.68417

Excited State 3: Singlet-A 3.4972 eV 354.52 nm f=0.1324 <S**2>=0.000

137 ->139 0.69219

Excited State 4: Singlet-A 3.6963 eV 335.43 nm f=1.8380 <S**2>=0.000

137 ->140 0.65364

138 ->139 -0.23720

Excited State 5: Singlet-A 4.0332 eV 307.41 nm f=0.0594 <S**2>=0.000

136 ->140 0.43968

138 ->141 0.51573

Excited State 6: Singlet-A 4.0544 eV 305.80 nm f=0.0243 <S**2>=0.000

136 ->139 0.61864

137 ->141 -0.29090

Excited State 7: Singlet-A 4.1410 eV 299.41 nm f=0.0002 <S**2>=0.000

135 ->139 0.59339

136 ->140 -0.19815

138 ->141 0.28324

Excited State 8: Singlet-A 4.2049 eV 294.85 nm f=0.0684 <S**2>=0.000

135 ->140 -0.33866

136 ->139 0.28147

137 ->141 0.53021

Excited State 9: Singlet-A 4.2804 eV 289.66 nm f=0.1331 <S**2>=0.000

135 ->139 0.30774

136 ->140 0.49708

138 ->141 -0.34517

Excited State 10: Singlet-A 4.3253 eV 286.65 nm f=0.0387 <S**2>=0.000

135 ->140 0.59296

137 ->141 0.33832

Excited State 11: Singlet-A 4.4447 eV 278.95 nm f=0.0063 <S**2>=0.000

130 ->140 0.25132

131 ->139 0.37108

131 ->140 -0.21145

134 ->139 -0.12031

137 ->143 -0.21237

137 ->144 0.14788

138 ->144 0.32708

Excited State 12: Singlet-A 4.4456 eV 278.89 nm f=0.0036 <S**2>=0.000

130 ->139 0.39060

130 ->140 0.18777

131 ->140 0.25788

137 ->143 -0.22430

137 ->144 -0.18772

137 ->145 0.11848

138 ->143 0.31213

Excited State 13: Singlet-A 4.5324 eV 273.55 nm f=0.0008 <S**2>=0.000

132 ->139 0.13078

132 ->140 0.11599

133 ->139 -0.32308

133 ->140 0.34741

134 ->139 -0.12753

137 ->145 -0.15538

137 ->146 0.16733

138 ->142 -0.16601

138 ->146 0.28927

Excited State 14: Singlet-A 4.5362 eV 273.32 nm f=0.0024 <S**2>=0.000

132 ->139 0.36810

132 ->140 0.31574

133 ->139 0.14753

133 ->140 -0.12782

137 ->142 0.10085

137 ->145 -0.23790

137 ->146 -0.17227

138 ->145 0.24126

Excited State 15: Singlet-A 4.5965 eV 269.74 nm f=0.0015 <S**2>=0.000

131 ->139 0.11846

134 ->139 0.44288

136 ->141 -0.20140

137 ->147 0.10909

138 ->142 0.39613

138 ->146 0.10603

Excited State 16: Singlet-A 4.7325 eV 261.98 nm f=0.0062 <S**2>=0.000

134 ->140 0.46870

135 ->139 0.13228

135 ->141 0.14739

137 ->142 -0.38375

138 ->147 -0.17519

Excited State 17: Singlet-A 4.8064 eV 257.96 nm f=0.0005 <S**2>=0.000

134 ->139 0.45623

136 ->141 0.15190

138 ->142 -0.44774

Excited State 18: Singlet-A 4.8365 eV 256.35 nm f=0.0403 <S**2>=0.000

129 ->139 -0.13685

134 ->140 -0.14033

135 ->141 0.59639

136 ->142 0.18494

137 ->142 0.11455

Excited State 19: Singlet-A 4.8603 eV 255.09 nm f=0.0274 <S**2>=0.000

130 ->139 -0.27501

130 ->140 -0.16223

131 ->139 0.38966

131 ->140 0.28911

133 ->139 0.11470

134 ->140 -0.13829

136 ->141 -0.17654

137 ->142 -0.16833

138 ->142 -0.15205

Excited State 20: Singlet-A 4.8649 eV 254.85 nm f=0.1221 <S**2>=0.000

131 ->139 0.21772

136 ->141 0.56787

138 ->142 0.19555

138 ->148 0.12898

**Compound 3- syn (R =C(CH3)3)**

Excited State 1: Singlet-A 3.4157 eV 362.99 nm f=0.4271 <S**2>=0.000

201 ->204 0.21354

202 ->203 0.66492

This state for optimization and/or second-order correction.

Total Energy, E(TD-HF/TD-KS) = -2245.26001935

Copying the excited state density for this state as the 1-particle RhoCI density.

Excited State 2: Singlet-A 3.4361 eV 360.83 nm f=0.4346 <S**2>=0.000

201 ->203 -0.48863

202 ->204 0.49580

Excited State 3: Singlet-A 3.4736 eV 356.93 nm f=0.0158 <S**2>=0.000

201 ->203 0.50159

202 ->204 0.49085

Excited State 4: Singlet-A 3.6622 eV 338.55 nm f=1.8689 <S**2>=0.000

201 ->204 0.66848

202 ->203 -0.21278

Excited State 5: Singlet-A 4.0335 eV 307.39 nm f=0.1177 <S**2>=0.000

200 ->204 0.37368

202 ->205 0.56789

Excited State 6: Singlet-A 4.0702 eV 304.61 nm f=0.0071 <S**2>=0.000

199 ->204 0.11771

200 ->203 0.54919

201 ->205 -0.40084

Excited State 7: Singlet-A 4.1285 eV 300.31 nm f=0.0018 <S**2>=0.000

199 ->203 0.61367

200 ->204 -0.19131

201 ->206 0.11026

202 ->205 0.22266

Excited State 8: Singlet-A 4.1896 eV 295.93 nm f=0.0979 <S**2>=0.000

199 ->204 -0.26419

200 ->203 0.39562

201 ->205 0.49442

Excited State 9: Singlet-A 4.2823 eV 289.53 nm f=0.0536 <S**2>=0.000

197 ->203 -0.14024

198 ->203 -0.12310

198 ->204 0.14105

199 ->203 0.23473

200 ->204 0.50841

202 ->205 -0.30069

Excited State 10: Singlet-A 4.2928 eV 288.82 nm f=0.0038 <S**2>=0.000

197 ->203 -0.25893

197 ->204 -0.25328

198 ->203 0.33265

198 ->204 -0.24511

199 ->204 0.28033

201 ->205 0.18142

201 ->209 -0.14469

202 ->210 0.14637

Excited State 11: Singlet-A 4.3014 eV 288.24 nm f=0.0301 <S**2>=0.000

197 ->203 0.38724

197 ->204 0.23694

198 ->203 0.22408

198 ->204 -0.29480

199 ->203 0.12815

200 ->204 0.20783

201 ->210 0.17084

202 ->209 -0.13550

202 ->211 0.10575

Excited State 12: Singlet-A 4.3158 eV 287.28 nm f=0.0168 <S**2>=0.000

197 ->203 0.12503

197 ->204 0.14469

198 ->203 -0.18753

198 ->204 0.15605

199 ->204 0.55827

201 ->205 0.22093

201 ->211 -0.10179

Excited State 13: Singlet-A 4.4412 eV 279.17 nm f=0.0043 <S**2>=0.000

194 ->203 0.29935

194 ->204 0.21037

195 ->203 0.26528

195 ->204 0.21073

201 ->207 -0.24203

201 ->208 -0.19106

202 ->207 0.27909

202 ->208 0.19194

Excited State 14: Singlet-A 4.4492 eV 278.67 nm f=0.0073 <S**2>=0.000

194 ->203 -0.22439

194 ->204 0.22670

195 ->203 0.28568

195 ->204 -0.25161

201 ->207 -0.18401

201 ->208 0.22026

202 ->207 -0.21856

202 ->208 0.28698

Excited State 15: Singlet-A 4.5653 eV 271.58 nm f=0.0021 <S**2>=0.000

196 ->203 0.47083

197 ->204 -0.11353

198 ->203 -0.12510

198 ->204 -0.11661

200 ->203 -0.10169

200 ->205 -0.16195

202 ->206 0.38326

Excited State 16: Singlet-A 4.6077 eV 269.08 nm f=0.0001 <S**2>=0.000

197 ->203 0.14631

198 ->203 0.47466

198 ->204 0.46037

202 ->206 0.11299

Excited State 17: Singlet-A 4.6246 eV 268.10 nm f=0.0001 <S**2>=0.000

197 ->203 -0.42720

197 ->204 0.51099

198 ->203 0.13727

202 ->206 0.11795

Excited State 18: Singlet-A 4.7129 eV 263.07 nm f=0.0112 <S**2>=0.000

196 ->204 0.47527

199 ->203 0.12609

199 ->205 0.10357

201 ->206 -0.40931

202 ->209 -0.12481

202 ->211 -0.12891

Excited State 19: Singlet-A 4.7671 eV 260.08 nm f=0.0125 <S**2>=0.000

196 ->203 -0.42317

202 ->206 0.49601

Excited State 20: Singlet-A 4.8154 eV 257.47 nm f=0.0250 <S**2>=0.000

193 ->203 -0.16971

199 ->205 0.59464

200 ->206 0.18681

201 ->206 0.10612

**Compound 3- anti (R =C(CH3)3)**

Excited State 1: Singlet-A 3.3955 eV 365.15 nm f=0.3842 <S**2>=0.000

201 ->204 0.23486

202 ->203 0.65160

202 ->204 0.10709

This state for optimization and/or second-order correction.

Total Energy, E(TD-HF/TD-KS) = -2245.25783777

Copying the excited state density for this state as the 1-particle RhoCI density.

Excited State 2: Singlet-A 3.4130 eV 363.27 nm f=0.4158 <S**2>=0.000

201 ->203 -0.34651

202 ->203 -0.10018

202 ->204 0.59599

Excited State 3: Singlet-A 3.4483 eV 359.55 nm f=0.0109 <S**2>=0.000

201 ->203 0.60817

202 ->204 0.35390

Excited State 4: Singlet-A 3.6396 eV 340.65 nm f=1.9701 <S**2>=0.000

201 ->204 0.66171

202 ->203 -0.23558

Excited State 5: Singlet-A 4.0219 eV 308.28 nm f=0.1261 <S**2>=0.000

200 ->204 -0.38577

202 ->205 0.56007

Excited State 6: Singlet-A 4.0700 eV 304.63 nm f=0.0047 <S**2>=0.000

199 ->204 -0.13694

200 ->203 0.52204

201 ->205 0.43136

Excited State 7: Singlet-A 4.1263 eV 300.48 nm f=0.0041 <S**2>=0.000

199 ->203 0.60516

200 ->204 0.20250

201 ->206 0.11146

202 ->205 0.23973

Excited State 8: Singlet-A 4.1860 eV 296.19 nm f=0.0954 <S**2>=0.000

196 ->203 0.10318

199 ->204 -0.28800

200 ->203 -0.42551

201 ->205 0.45317

Excited State 9: Singlet-A 4.2769 eV 289.89 nm f=0.0429 <S**2>=0.000

198 ->203 0.24299

198 ->204 0.19247

199 ->203 -0.22941

199 ->204 -0.10932

200 ->204 0.45265

201 ->205 -0.10116

201 ->206 -0.10214

202 ->205 0.27811

Excited State 10: Singlet-A 4.2889 eV 289.08 nm f=0.0509 <S**2>=0.000

198 ->203 0.33880

198 ->204 0.26209

199 ->203 0.15824

199 ->204 -0.28689

200 ->204 -0.27365

201 ->205 -0.16162

201 ->210 0.11584

202 ->205 -0.14357

202 ->209 -0.10136

Excited State 11: Singlet-A 4.2958 eV 288.62 nm f=0.0082 <S**2>=0.000

197 ->203 0.43749

197 ->204 -0.42112

197 ->205 0.10226

198 ->204 0.10522

201 ->209 0.13684

201 ->210 -0.10720

202 ->210 -0.15740

Excited State 12: Singlet-A 4.3009 eV 288.28 nm f=0.0096 <S**2>=0.000

198 ->203 0.24512

198 ->204 0.20370

199 ->204 0.52409

201 ->205 0.24107

Excited State 13: Singlet-A 4.4298 eV 279.89 nm f=0.0036 <S**2>=0.000

194 ->203 0.25859

194 ->204 0.21116

195 ->203 0.29924

195 ->204 0.22923

201 ->207 -0.22254

201 ->208 -0.18922

202 ->206 -0.11991

202 ->207 0.25369

202 ->208 0.22430

Excited State 14: Singlet-A 4.4425 eV 279.09 nm f=0.0085 <S**2>=0.000

194 ->203 -0.25662

194 ->204 0.24032

195 ->203 0.26080

195 ->204 -0.24885

201 ->207 -0.21454

201 ->208 0.19511

202 ->207 -0.25786

202 ->208 0.23140

Excited State 15: Singlet-A 4.5555 eV 272.16 nm f=0.0026 <S**2>=0.000

196 ->203 0.46542

198 ->204 -0.13025

200 ->203 0.10262

200 ->205 0.14944

202 ->206 0.41778

Excited State 16: Singlet-A 4.6014 eV 269.45 nm f=0.0000 <S**2>=0.000

198 ->203 -0.45166

198 ->204 0.50249

202 ->206 0.12312

Excited State 17: Singlet-A 4.6084 eV 269.04 nm f=0.0000 <S**2>=0.000

197 ->203 0.51253

197 ->204 0.47799

Excited State 18: Singlet-A 4.6944 eV 264.11 nm f=0.0114 <S**2>=0.000

196 ->204 0.49256

199 ->203 0.12847

201 ->206 -0.41256

202 ->209 -0.11056

202 ->211 -0.13297

Excited State 19: Singlet-A 4.7586 eV 260.55 nm f=0.0103 <S**2>=0.000

196 ->203 -0.44039

202 ->206 0.48899

Excited State 20: Singlet-A 4.8234 eV 257.05 nm f=0.0244 <S**2>=0.000

193 ->203 -0.18660

199 ->205 0.56188

200 ->206 -0.19005

201 ->206 0.19866

**Compound 4- (R =H)**

Excited State 1: Singlet-A 2.7242 eV 455.12 nm f=2.3443 <S**2>=0.000

110 ->111 0.70471

This state for optimization and/or second-order correction.

Total Energy, E(TD-HF/TD-KS) = -1307.96360883

Copying the excited state density for this state as the 1-particle RhoCI density.

Excited State 2: Singlet-A 3.2667 eV 379.54 nm f=0.0930 <S**2>=0.000

109 ->111 0.54764

110 ->112 -0.43668

Excited State 3: Singlet-A 3.5324 eV 350.99 nm f=0.1209 <S**2>=0.000

108 ->111 0.50738

109 ->111 -0.26668

110 ->112 -0.37777

Excited State 4: Singlet-A 3.7579 eV 329.93 nm f=0.0257 <S**2>=0.000

108 ->111 0.46812

109 ->111 0.34183

110 ->112 0.39303

Excited State 5: Singlet-A 3.9945 eV 310.39 nm f=0.0098 <S**2>=0.000

104 ->111 -0.10405

107 ->111 -0.46384

110 ->113 0.50008

Excited State 6: Singlet-A 4.0924 eV 302.96 nm f=0.2605 <S**2>=0.000

107 ->111 -0.17848

109 ->112 0.62438

110 ->113 -0.24026

Excited State 7: Singlet-A 4.1837 eV 296.35 nm f=0.0039 <S**2>=0.000

104 ->111 0.46270

107 ->111 -0.18827

109 ->115 0.11538

110 ->114 -0.17029

110 ->115 -0.40784

Excited State 8: Singlet-A 4.3364 eV 285.92 nm f=0.0023 <S**2>=0.000

106 ->111 0.53534

106 ->112 0.17075

107 ->111 -0.10387

109 ->116 0.12191

110 ->116 0.34404

Excited State 9: Singlet-A 4.3623 eV 284.22 nm f=0.0044 <S**2>=0.000

104 ->111 -0.12050

105 ->111 0.39793

105 ->112 -0.14642

107 ->111 -0.18024

108 ->112 0.27782

109 ->114 0.14779

110 ->113 -0.17479

110 ->114 -0.29889

110 ->115 0.14129

Excited State 10: Singlet-A 4.3832 eV 282.86 nm f=0.0107 <S**2>=0.000

105 ->111 -0.33067

105 ->112 0.11126

107 ->111 -0.20261

108 ->112 0.45576

109 ->114 -0.10271

110 ->113 -0.18873

110 ->114 0.17209

Excited State 11: Singlet-A 4.5001 eV 275.51 nm f=0.1382 <S**2>=0.000

104 ->111 0.15165

105 ->111 0.10102

106 ->111 0.18222

107 ->111 0.29957

108 ->112 0.36565

109 ->112 0.24403

110 ->113 0.28297

110 ->116 -0.12767

110 ->117 0.19092

Excited State 12: Singlet-A 4.6223 eV 268.23 nm f=0.0064 <S**2>=0.000

104 ->111 0.16608

105 ->111 0.23316

106 ->111 -0.30516

110 ->114 0.39325

110 ->115 0.13118

110 ->116 0.35376

Excited State 13: Singlet-A 4.6397 eV 267.23 nm f=0.0235 <S**2>=0.000

104 ->111 0.20479

105 ->111 -0.33597

106 ->111 -0.14174

110 ->114 -0.32277

110 ->115 0.38666

110 ->116 0.20930

Excited State 14: Singlet-A 4.6713 eV 265.42 nm f=0.0269 <S**2>=0.000

103 ->111 -0.13192

104 ->111 -0.31830

106 ->111 -0.15713

107 ->111 0.11281

110 ->114 -0.13485

110 ->115 -0.30836

110 ->116 0.33330

110 ->117 0.27797

Excited State 15: Singlet-A 4.7656 eV 260.16 nm f=0.0351 <S**2>=0.000

103 ->111 -0.22278

107 ->111 -0.12319

107 ->112 -0.27999

108 ->112 -0.13384

109 ->113 0.40333

110 ->113 -0.13470

110 ->114 0.16473

110 ->115 0.10600

110 ->116 -0.12581

110 ->117 0.27402

Excited State 16: Singlet-A 4.8516 eV 255.55 nm f=0.0481 <S**2>=0.000

103 ->111 0.16790

104 ->111 -0.13152

107 ->112 -0.13928

108 ->112 0.13006

109 ->113 0.45079

110 ->117 -0.39450

Excited State 17: Singlet-A 4.9186 eV 252.07 nm f=0.0026 <S**2>=0.000

103 ->111 -0.34627

107 ->112 0.54603

109 ->113 0.21530

Excited State 18: Singlet-A 5.0630 eV 244.88 nm f=0.0238 <S**2>=0.000

103 ->111 0.32374

104 ->112 -0.23064

107 ->112 0.10492

108 ->113 -0.25649

109 ->114 0.20160

109 ->115 0.27454

110 ->117 0.24792

110 ->118 -0.18764

Excited State 19: Singlet-A 5.0842 eV 243.86 nm f=0.0007 <S**2>=0.000

104 ->112 -0.14632

105 ->111 0.19407

105 ->112 0.38426

105 ->113 -0.11146

107 ->114 0.10609

109 ->114 -0.33866

109 ->115 0.31016

110 ->114 -0.17526

Excited State 20: Singlet-A 5.1156 eV 242.36 nm f=0.0328 <S**2>=0.000

103 ->111 -0.14603

104 ->111 -0.10070

104 ->112 -0.32042

105 ->112 -0.12291

107 ->112 -0.11654

108 ->113 0.35967

109 ->113 -0.10688

109 ->114 0.19866

109 ->115 0.27487

110 ->118 0.20537

**Compound 4- (R =C(CH3)3)**

Excited State 1: Singlet-A 2.8358 eV 437.21 nm f=2.3281 <S**2>=0.000

142 ->143 0.70555

This state for optimization and/or second-order correction.

Total Energy, E(TD-HF/TD-KS) = -1622.46436343

Copying the excited state density for this state as the 1-particle RhoCI density.

Excited State 2: Singlet-A 3.3671 eV 368.22 nm f=0.0293 <S**2>=0.000

141 ->143 0.53166

142 ->144 0.45588

Excited State 3: Singlet-A 3.7054 eV 334.60 nm f=0.0353 <S**2>=0.000

140 ->143 -0.33819

141 ->143 -0.37262

142 ->144 0.45964

Excited State 4: Singlet-A 3.7990 eV 326.36 nm f=0.0205 <S**2>=0.000

140 ->143 0.56307

141 ->143 -0.26668

142 ->144 0.26767

142 ->149 -0.13801

Excited State 5: Singlet-A 4.0432 eV 306.65 nm f=0.0049 <S**2>=0.000

136 ->143 0.11505

139 ->143 0.46931

140 ->143 0.12302

142 ->145 0.47914

Excited State 6: Singlet-A 4.1528 eV 298.56 nm f=0.3260 <S**2>=0.000

139 ->143 0.20079

141 ->144 0.61256

142 ->145 -0.24710

Excited State 7: Singlet-A 4.2230 eV 293.59 nm f=0.0299 <S**2>=0.000

136 ->143 0.45260

139 ->143 -0.17974

141 ->144 0.17223

142 ->146 -0.27078

142 ->147 -0.31972

142 ->148 0.12143

Excited State 8: Singlet-A 4.3949 eV 282.11 nm f=0.0022 <S**2>=0.000

137 ->143 0.48761

137 ->144 -0.17597

141 ->146 -0.14377

141 ->147 0.12309

142 ->145 0.10382

142 ->146 -0.24229

142 ->147 0.26399

Excited State 9: Singlet-A 4.4020 eV 281.66 nm f=0.0032 <S**2>=0.000

137 ->143 0.10867

138 ->143 0.50346

138 ->144 0.19305

141 ->148 0.16423

142 ->146 -0.16219

142 ->148 -0.32184

Excited State 10: Singlet-A 4.4764 eV 276.97 nm f=0.0728 <S**2>=0.000

138 ->143 -0.13866

139 ->143 0.26483

140 ->143 -0.11965

140 ->144 0.37120

141 ->144 -0.19159

142 ->145 -0.19885

142 ->149 -0.37039

Excited State 11: Singlet-A 4.4860 eV 276.38 nm f=0.0149 <S**2>=0.000

136 ->143 -0.18005

137 ->143 -0.16406

138 ->143 0.10593

139 ->143 -0.27160

140 ->143 -0.11451

140 ->144 0.40119

141 ->144 0.15760

142 ->145 0.33896

142 ->149 -0.10526

Excited State 12: Singlet-A 4.6733 eV 265.30 nm f=0.0133 <S**2>=0.000

133 ->143 -0.28080

134 ->143 0.11983

135 ->143 0.21365

136 ->143 0.11026

137 ->143 0.19265

138 ->143 -0.10623

140 ->144 0.29304

142 ->146 0.24527

142 ->148 -0.18584

142 ->149 0.27290

Excited State 13: Singlet-A 4.6893 eV 264.40 nm f=0.0048 <S**2>=0.000

137 ->143 0.15114

138 ->143 0.39062

142 ->146 0.30862

142 ->148 0.44325

Excited State 14: Singlet-A 4.7118 eV 263.14 nm f=0.0201 <S**2>=0.000

133 ->143 -0.19889

135 ->143 0.18434

136 ->143 0.20752

137 ->143 -0.32243

142 ->146 -0.17756

142 ->147 0.44424

142 ->148 0.10048

Excited State 15: Singlet-A 4.7232 eV 262.50 nm f=0.0214 <S**2>=0.000

133 ->143 0.23214

134 ->143 0.27927

135 ->143 0.51278

135 ->144 0.12187

140 ->144 -0.16210

141 ->145 0.10050

142 ->149 -0.15075

Excited State 16: Singlet-A 4.7473 eV 261.17 nm f=0.0072 <S**2>=0.000

133 ->143 0.44112

134 ->143 0.18126

135 ->143 -0.18687

136 ->143 0.27849

142 ->146 0.19858

142 ->147 0.24308

142 ->148 -0.12088

Excited State 17: Singlet-A 4.7901 eV 258.84 nm f=0.0358 <S**2>=0.000

133 ->143 -0.10559

134 ->143 -0.25299

136 ->143 0.13822

139 ->143 -0.10872

139 ->144 -0.27694

141 ->145 0.39087

142 ->145 0.10173

142 ->146 0.23114

142 ->148 -0.15954

142 ->149 -0.13739

Excited State 18: Singlet-A 4.8470 eV 255.80 nm f=0.1315 <S**2>=0.000

133 ->143 0.14564

136 ->143 -0.19157

139 ->144 -0.25798

140 ->144 0.13035

141 ->145 0.35133

142 ->147 -0.10437

142 ->148 0.14948

142 ->149 0.36391

Excited State 19: Singlet-A 4.9125 eV 252.38 nm f=0.0025 <S**2>=0.000

133 ->143 0.18321

134 ->143 -0.32032

135 ->143 0.19578

139 ->144 0.48493

140 ->144 0.11562

141 ->145 0.22571

Excited State 20: Singlet-A 4.9866 eV 248.63 nm f=0.0219 <S**2>=0.000

133 ->143 -0.16344

134 ->143 0.30535

135 ->143 -0.12946

139 ->144 0.21514

141 ->145 0.30090

141 ->146 -0.11008

142 ->149 -0.14003

142 ->150 0.37281

**Compound 5: syn ( R = H)**

Excited State 1: Singlet-A 2.1609 eV 573.77 nm f=0.0006 <S**2>=0.000

306 -> 307 0.70574

This state for optimization and/or second-order correction.

Total Energy, E(TD-HF/TD-KS) = -3584.35196868

Copying the excited state density for this state as the 1-particle RhoCI density.

Excited State 2: Singlet-A 2.5325 eV 489.57 nm f=0.2966 <S**2>=0.000

305 -> 307 0.39025

306 -> 308 0.58152

Excited State 3: Singlet-A 2.7078 eV 457.88 nm f=4.0618 <S**2>=0.000

304 -> 307 0.21925

305 -> 307 0.55526

306 -> 308 -0.36447

Excited State 4: Singlet-A 2.7342 eV 453.46 nm f=0.7200 <S**2>=0.000

304 -> 307 0.63758

305 -> 307 -0.17807

306 -> 308 0.14359

306 -> 309 0.17187

Excited State 5: Singlet-A 2.9550 eV 419.58 nm f=0.0013 <S**2>=0.000

304 -> 307 -0.19271

306 -> 309 0.67431

Excited State 6: Singlet-A 2.9648 eV 418.19 nm f=0.0015 <S**2>=0.000

305 -> 308 0.70357

**Compound 5: anti (R = H)**

Excited State 1: Singlet-A 2.3389 eV 530.10 nm f=0.0016 <S**2>=0.000

306 -> 307 0.70573

This state for optimization and/or second-order correction.

Total Energy, E(TD-HF/TD-KS) = -3583.43073097

Copying the excited state density for this state as the 1-particle RhoCI density.

Excited State 2: Singlet-A 2.5591 eV 484.49 nm f=0.1686 <S**2>=0.000

305 -> 307 0.55241

306 -> 308 -0.43021

Excited State 3: Singlet-A 2.7385 eV 452.74 nm f=4.8394 <S**2>=0.000

305 -> 307 0.43160

306 -> 308 0.55261

Excited State 4: Singlet-A 2.8308 eV 437.99 nm f=0.0037 <S**2>=0.000

305 -> 308 0.70399

Excited State 5: Singlet-A 2.9310 eV 423.01 nm f=0.1464 <S**2>=0.000

303 -> 307 -0.12155

304 -> 307 0.65998

306 -> 309 -0.20417

Excited State 6: Singlet-A 3.0983 eV 400.17 nm f=0.1055 <S**2>=0.000

303 -> 307 0.27543

304 -> 307 0.22650

306 -> 309 0.59365

Excited State 7: Singlet-A 3.1573 eV 392.69 nm f=0.0311 <S**2>=0.000

303 -> 307 0.59399

305 -> 309 -0.15912

306 -> 309 -0.31577

Excited State 8: Singlet-A 3.1838 eV 389.43 nm f=0.0351 <S**2>=0.000

304 -> 308 0.61268

305 -> 309 0.10728

306 -> 310 -0.29607

Excited State 9: Singlet-A 3.2521 eV 381.25 nm f=0.0560 <S**2>=0.000

302 -> 307 0.49919

303 -> 307 -0.16795

305 -> 309 -0.43888

306 -> 310 -0.10565

Excited State 10: Singlet-A 3.3300 eV 372.32 nm f=0.0406 <S**2>=0.000

302 -> 307 0.15893

303 -> 308 0.42707

304 -> 308 0.23490

305 -> 310 -0.11107

306 -> 310 0.44154

Excited State 11: Singlet-A 3.4188 eV 362.65 nm f=0.0082 <S**2>=0.000

301 -> 307 0.69554

Excited State 12: Singlet-A 3.4370 eV 360.73 nm f=0.0297 <S**2>=0.000

301 -> 308 0.18485

302 -> 307 -0.24968

302 -> 308 0.10326

303 -> 308 0.45167

305 -> 309 -0.24414

305 -> 310 -0.13090

306 -> 310 -0.28455

Excited State 13: Singlet-A 3.5021 eV 354.03 nm f=0.0075 <S**2>=0.000

301 -> 308 -0.10830

302 -> 307 -0.18977

302 -> 308 -0.38941

304 -> 308 0.10579

305 -> 309 -0.22893

305 -> 310 0.45072

Excited State 14: Singlet-A 3.5344 eV 350.79 nm f=0.2407 <S**2>=0.000

299 -> 307 -0.11447

301 -> 308 0.36917

302 -> 307 0.26779

302 -> 308 -0.14849

303 -> 308 0.17796

305 -> 309 0.29215

305 -> 310 0.27180

306 -> 310 -0.15752

Excited State 15: Singlet-A 3.5947 eV 344.91 nm f=0.0012 <S**2>=0.000

301 -> 308 -0.13449

302 -> 308 0.53128

305 -> 310 0.42838

Excited State 16: Singlet-A 3.6390 eV 340.71 nm f=0.0059 <S**2>=0.000

299 -> 307 0.15646

300 -> 307 0.12132

304 -> 309 0.64502

306 -> 311 0.14094

Excited State 17: Singlet-A 3.7050 eV 334.64 nm f=0.0109 <S**2>=0.000

298 -> 307 -0.18726

299 -> 307 0.37590

301 -> 308 0.42536

302 -> 308 0.10712

303 -> 308 -0.16957

304 -> 308 0.10806

306 -> 310 0.21065

Excited State 18: Singlet-A 3.7551 eV 330.17 nm f=0.0426 <S**2>=0.000

298 -> 307 -0.23380

299 -> 307 0.30916

300 -> 307 -0.30370

301 -> 308 -0.25310

302 -> 307 0.15982

303 -> 308 0.11204

303 -> 309 0.24046

304 -> 308 -0.10086

305 -> 309 0.17010

306 -> 310 -0.16858

Excited State 19: Singlet-A 3.7731 eV 328.60 nm f=0.0275 <S**2>=0.000

298 -> 307 -0.20517

299 -> 307 0.20786

300 -> 307 0.51120

301 -> 308 -0.11308

302 -> 307 0.10461

303 -> 309 -0.19725

304 -> 309 -0.18180

305 -> 309 0.10091

Excited State 20: Singlet-A 3.8551 eV 321.61 nm f=0.0193 <S**2>=0.000

300 -> 307 -0.32298

303 -> 309 -0.38885

306 -> 311 0.46617

**Compound 6: syn ( R = H)**

Excited State 1: Singlet-A 2.5783 eV 480.87 nm f=0.6172 <S**2>=0.000

261 -> 263 -0.40874

261 -> 264 0.22056

262 -> 263 0.26364

262 -> 264 0.45000

This state for optimization and/or second-order correction.

Total Energy, E(TD-HF/TD-KS) = -3150.97898004

Copying the excited state density for this state as the 1-particle RhoCI density.

Excited State 2: Singlet-A 2.6717 eV 464.07 nm f=1.3973 <S**2>=0.000

261 -> 263 0.21076

262 -> 263 0.63172

262 -> 264 -0.21693

Excited State 3: Singlet-A 2.6791 eV 462.78 nm f=0.0480 <S**2>=0.000

261 -> 263 0.49667

262 -> 264 0.49077

Excited State 4: Singlet-A 2.6954 eV 459.99 nm f=3.2486 <S**2>=0.000

261 -> 263 0.19020

261 -> 264 0.65640

262 -> 263 -0.16211

Excited State 5: Singlet-A 3.1407 eV 394.77 nm f=0.0460 <S**2>=0.000

259 -> 263 0.29536

260 -> 263 0.28623

260 -> 264 0.37738

261 -> 265 -0.31314

262 -> 265 0.15904

262 -> 266 -0.22069

Excited State 6: Singlet-A 3.1491 eV 393.71 nm f=0.2213 <S**2>=0.000

259 -> 264 0.28279

260 -> 263 0.34307

260 -> 264 -0.29286

261 -> 265 0.15704

261 -> 266 0.25998

262 -> 265 0.33224

Excited State 7: Singlet-A 3.2427 eV 382.35 nm f=0.0032 <S**2>=0.000

259 -> 263 -0.19308

259 -> 264 -0.30135

260 -> 263 0.43659

261 -> 266 0.15336

262 -> 265 -0.36386

Excited State 8: Singlet-A 3.2607 eV 380.23 nm f=0.0002 <S**2>=0.000

259 -> 263 0.46493

259 -> 264 -0.22419

260 -> 264 -0.33967

261 -> 265 0.12709

262 -> 266 -0.28408

Excited State 9: Singlet-A 3.3052 eV 375.12 nm f=0.0022 <S**2>=0.000

260 -> 263 0.11667

260 -> 264 0.32561

261 -> 265 0.57619

262 -> 266 -0.15989

Excited State 10: Singlet-A 3.3268 eV 372.68 nm f=0.0205 <S**2>=0.000

259 -> 263 -0.13039

259 -> 264 -0.39884

260 -> 263 0.13263

261 -> 266 -0.34510

262 -> 265 0.41224

Excited State 11: Singlet-A 3.3851 eV 366.26 nm f=0.0201 <S**2>=0.000

257 -> 264 -0.11801

258 -> 263 -0.12707

259 -> 263 0.32019

259 -> 264 -0.11988

262 -> 266 0.55442

Excited State 12: Singlet-A 3.4405 eV 360.37 nm f=0.1227 <S**2>=0.000

257 -> 264 -0.20497

258 -> 263 0.21487

259 -> 264 -0.25127

260 -> 263 -0.20268

261 -> 266 0.47930

262 -> 265 0.14998

Excited State 13: Singlet-A 3.6197 eV 342.52 nm f=0.0087 <S**2>=0.000

257 -> 263 -0.20009

257 -> 264 0.30953

258 -> 263 0.44705

258 -> 264 0.25283

259 -> 263 0.11751

261 -> 267 -0.12045

262 -> 266 0.14118

Excited State 14: Singlet-A 3.6363 eV 340.96 nm f=0.0935 <S**2>=0.000

257 -> 263 -0.16806

257 -> 264 0.44482

258 -> 263 -0.30992

259 -> 264 -0.13064

261 -> 266 0.19229

262 -> 267 -0.25253

Excited State 15: Singlet-A 3.7065 eV 334.50 nm f=0.0104 <S**2>=0.000

255 -> 263 -0.30567

255 -> 264 -0.12641

256 -> 263 0.20073

256 -> 264 0.19675

261 -> 267 0.39121

262 -> 267 -0.30168

262 -> 268 0.10848

Excited State 16: Singlet-A 3.7118 eV 334.03 nm f=0.0243 <S**2>=0.000

255 -> 264 0.20175

256 -> 263 -0.18601

256 -> 264 0.33683

257 -> 264 0.12234

259 -> 264 -0.10636

260 -> 265 0.10391

261 -> 267 0.32348

262 -> 267 0.33385

Excited State 17: Singlet-A 3.7609 eV 329.67 nm f=0.1314 <S**2>=0.000

255 -> 264 0.28234

256 -> 263 0.31080

260 -> 265 0.48267

261 -> 268 -0.12188

262 -> 267 -0.10663

Excited State 18: Singlet-A 3.8034 eV 325.98 nm f=0.0809 <S**2>=0.000

255 -> 263 0.43481

255 -> 264 -0.15542

256 -> 263 0.12994

257 -> 263 0.14682

258 -> 264 0.13969

259 -> 265 0.27250

260 -> 266 -0.29404

261 -> 267 0.20681

Excited State 19: Singlet-A 3.8127 eV 325.18 nm f=0.0284 <S**2>=0.000

256 -> 264 0.13759

257 -> 263 0.11560

258 -> 263 -0.24182

258 -> 264 0.56074

259 -> 265 -0.17203

260 -> 265 0.13337

260 -> 266 0.10115

261 -> 267 -0.14404

Excited State 20: Singlet-A 3.8152 eV 324.97 nm f=0.1347 <S**2>=0.000

256 -> 263 0.24906

257 -> 263 0.44123

257 -> 264 0.21768

259 -> 265 -0.15425

260 -> 265 -0.28888

262 -> 267 0.17203

**Compound 6: anti (R = H)**

Excited State 1: Singlet-A 2.5476 eV 486.67 nm f=0.7193 <S**2>=0.000

261 -> 263 0.50426

262 -> 264 -0.48052

This state for optimization and/or second-order correction.

Total Energy, E(TD-HF/TD-KS) = -3150.97985254

Copying the excited state density for this state as the 1-particle RhoCI density.

Excited State 2: Singlet-A 2.6163 eV 473.89 nm f=0.2417 <S**2>=0.000

262 -> 263 0.70340

Excited State 3: Singlet-A 2.6502 eV 467.82 nm f=4.1112 <S**2>=0.000

261 -> 263 0.48617

262 -> 264 0.50820

Excited State 4: Singlet-A 2.6841 eV 461.92 nm f=0.2468 <S**2>=0.000

261 -> 264 0.70515

Excited State 5: Singlet-A 3.1076 eV 398.98 nm f=0.0332 <S**2>=0.000

259 -> 263 0.37364

260 -> 263 0.35335

260 -> 264 -0.22052

261 -> 265 0.35550

261 -> 266 0.18107

262 -> 266 0.10432

Excited State 6: Singlet-A 3.1135 eV 398.21 nm f=0.1259 <S**2>=0.000

259 -> 263 0.10479

259 -> 264 -0.19545

260 -> 263 0.17348

260 -> 264 0.44517

261 -> 266 0.12864

262 -> 265 0.35246

262 -> 266 -0.25233

Excited State 7: Singlet-A 3.1943 eV 388.14 nm f=0.0014 <S**2>=0.000

259 -> 263 -0.34484

260 -> 263 0.50842

261 -> 265 -0.10958

262 -> 265 -0.26495

262 -> 266 -0.16613

Excited State 8: Singlet-A 3.2542 eV 381.00 nm f=0.0030 <S**2>=0.000

259 -> 263 0.22435

259 -> 264 0.38007

260 -> 264 0.34448

261 -> 265 -0.14844

261 -> 266 0.24792

262 -> 265 -0.28952

Excited State 9: Singlet-A 3.2647 eV 379.77 nm f=0.0058 <S**2>=0.000

259 -> 264 0.25003

260 -> 263 0.21768

260 -> 264 -0.11235

261 -> 265 -0.36369

262 -> 265 0.40932

262 -> 266 0.24375

Excited State 10: Singlet-A 3.3062 eV 375.00 nm f=0.0159 <S**2>=0.000

257 -> 263 0.11718

259 -> 263 -0.24218

259 -> 264 0.31402

260 -> 264 0.20980

261 -> 265 0.40007

261 -> 266 -0.18373

262 -> 265 0.13128

262 -> 266 0.24771

Excited State 11: Singlet-A 3.3504 eV 370.06 nm f=0.0236 <S**2>=0.000

257 -> 263 0.10324

258 -> 264 -0.17031

259 -> 263 -0.17394

259 -> 264 -0.32319

261 -> 266 0.34696

262 -> 266 0.41949

Excited State 12: Singlet-A 3.3969 eV 365.00 nm f=0.1449 <S**2>=0.000

257 -> 263 0.24297

258 -> 264 0.20481

259 -> 263 -0.21013

259 -> 264 0.15132

260 -> 263 -0.12141

260 -> 264 -0.17416

261 -> 265 0.10090

261 -> 266 0.42737

262 -> 266 -0.23418

Excited State 13: Singlet-A 3.5816 eV 346.17 nm f=0.0024 <S**2>=0.000

257 -> 263 0.47526

258 -> 264 -0.40986

259 -> 263 0.12429

261 -> 265 -0.10462

261 -> 266 -0.10351

261 -> 267 0.10561

262 -> 266 -0.11584

Excited State 14: Singlet-A 3.6001 eV 344.39 nm f=0.0869 <S**2>=0.000

257 -> 263 0.36130

258 -> 264 0.42154

259 -> 263 0.10991

260 -> 264 0.10416

261 -> 266 -0.16213

262 -> 266 0.14076

262 -> 267 0.22530

Excited State 15: Singlet-A 3.6763 eV 337.25 nm f=0.0258 <S**2>=0.000

255 -> 263 -0.15199

255 -> 264 -0.10124

256 -> 264 0.34689

258 -> 264 -0.18969

260 -> 265 0.12539

262 -> 267 0.48028

Excited State 16: Singlet-A 3.6813 eV 336.79 nm f=0.0047 <S**2>=0.000

255 -> 263 -0.41403

255 -> 264 0.10475

256 -> 264 -0.11672

257 -> 263 -0.10938

261 -> 267 0.47074

261 -> 268 -0.10257

Excited State 17: Singlet-A 3.7267 eV 332.69 nm f=0.0725 <S**2>=0.000

255 -> 264 -0.13752

256 -> 263 0.40556

258 -> 263 -0.33058

260 -> 265 -0.37871

Excited State 18: Singlet-A 3.7607 eV 329.69 nm f=0.1487 <S**2>=0.000

255 -> 264 -0.14166

256 -> 263 -0.12881

256 -> 264 -0.12310

258 -> 263 0.46303

260 -> 265 -0.39967

260 -> 266 0.13953

262 -> 267 0.12908

Excited State 19: Singlet-A 3.7755 eV 328.40 nm f=0.0665 <S**2>=0.000

256 -> 263 0.35883

256 -> 264 0.17512

258 -> 263 0.35836

259 -> 265 -0.24134

260 -> 266 -0.26472

261 -> 267 0.20411

262 -> 267 -0.11865

Excited State 20: Singlet-A 3.7965 eV 326.57 nm f=0.1882 <S**2>=0.000

255 -> 263 -0.23063

256 -> 263 0.33676

256 -> 264 -0.11858

258 -> 263 0.16702

259 -> 265 0.31402

259 -> 266 0.13084

260 -> 265 0.27490

260 -> 266 0.14545

261 -> 267 -0.22025

1. Frisch MJ et al (2009) *Gaussian 09*, Revision A.1. Gaussian Inc., Wallingford
2. Herbert JM et al (2024) Visualizing and characterizing excited states from time-dependent density functional theory. *Phys Chem Chem Phys* **26**:3755–3794
3. Vogt RA, Gray TG, Crespo-Hernández CE (2012) Subpicosecond intersystem crossing in gold(I) naphthalene derivatives. *J Am Chem Soc* **134**:14808–14817
